# Supplementary material for: Assessing Atmospheric Gravity Wave Spectra in the Presence of Observational Gaps
Source: Copernicus journal article supplement (doi:10.5194/egusphere-2023-1598), 2023-08-11
Supplement: Supplementary file [file egusphere-2023-1598-AC1-supplement.pdf]

## **Response to Reviewer #2**

*We appreciate the comments and references given by both reviewers.*

*We repeat the reviewers' concerns and provide our respective responses in italics. The changes are in the revised manuscript.*

### **Limitations of spectra:**

There has been a resurgence of interest in techniques for determining scaling exponents, and scaling properties of geosystems. Over the last decades, many techniques have been developed, particularly to characterize/quantify the intermittency/ multifractal aspects of the system (e.g. trace moments, double trace moments, generalized structure functions etc.). Although the atmosphere is highly turbulent/intermittent/multifractal, the effect of the corrections is often viewed – as it was 50 years ago - as no more than an often fairly small “intermittency correction” to the spectral exponent (the  $K(2)$  in this paper). This is a shame since even if this correction to quasi-Gaussian spectral exponents is small (for the velocity field it is typically of the order of 0.15 in the horizontal, but closer to 0.25 in the vertical), the effect of intermittency may nevertheless be huge if measured for example at moments higher than 2 (the moment relevant for the spectrum). For example, the physically important energy fluxes depend on the 3rd moment of the velocity and their variances depend on the 6th moment, and the latter are apparently divergent (see the review [1])! Overall, the focus on spectra – that at best characterize the second moment – is thus rather limiting, especially if one is attempting to test theories that predict  $H$  (typically on dimensional grounds), but that ignore the intermittency. In these cases, at best the spectra must be supplemented with other techniques to determine  $K(2)$  so that  $H$  can be determined using the relation  $b = 1 + 2H - K(2)$ . Techniques such as Haar fluctuations that directly estimate  $H$  are therefore advantageous.

*We added the following text to l123:*

*“Despite that the term  $K(2)$  is fairly small, it is nontrivial in the non-Gaussian case and higher moments  $q$ , and the HSF allows for its calculation (Lovejoy and Schertzer, 2012), but this is beyond the scope of this paper.”*

*Based on 1000 simulation runs (see attached Figure), the estimated slopes ( $\beta=2$ ) were averaged to estimate the ensemble statistics after accounting for  $K(2)$  at gap percentage 0%. We see that the estimated  $\beta$  distribution of the corrected Haar Structure Function is shifted away from the true slope by 0.08. Since we know the slope of the simulated spectra and know that we did not introduce any intermittency to the time series the corrections should be small, and do not affect the final conclusions. The mean estimated  $\beta$  from both FFT and GLS is 1.98 (see Figure 5 in the manuscript) the uncorrected HST is in slightly better agreement with expectations.*

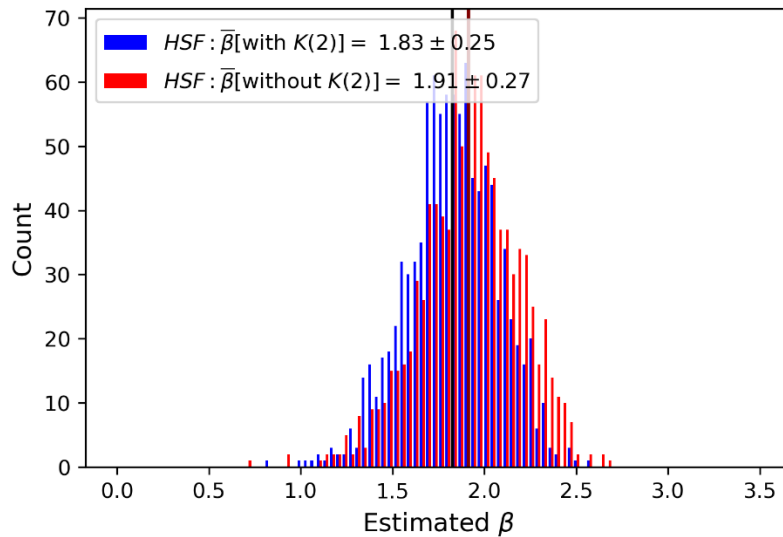

*Additionally, the Haar Structure Function is already the least biased method for gapped data (without correction) and the approximation  $K(2) \approx 0$  should be valid.*

### Difficulty in estimating

#### spectra when data are missing:

An additional problem with spectra is that they are notoriously difficult to estimate when there are missing data. For example, using interpolation to fill gaps (one of the methods used here) can cause huge biases. This is because the spectral exponent is related to  $H$  which is the maximum order of differentiability of the series (it is related to the fractal dimension of the signal).

Therefore - as is typically the case in geophysics where  $H < 1$  then using linear interpolation (i.e. using nonfractal curves with  $H = 1$ ) will badly bias the statistics (depending on the amount of missing data). This should be stated somewhere in this paper.

*We used the linearly interpolated time series only for the FFT because this was commonly used, while the GLS and HSF were directly applied on gapped data without interpolation. We mentioned that FFT is biased due to linear interpolation in line 255 with references to the effect, and later in the text as well.*

*To further stress this point we have added the following text to l255:*

*"This overestimation of  $\beta$  can also be explained by the fact that these interpolated (high frequency) components contribute locally by  $\beta = 3$  to the overall slope of the spectrum which result in positive bias when the true  $\beta$  is less than 3 (Lovejoy, 2014)."*

Alternatively, as discussed to some extent by the authors if instead of interpolation, Lomb-Scargle is used, one finds that it has big problems with spectral leakage [2] and these are often not improved with Multi-Taper Methods (as advocated by some [3]). This could be mentioned.

*We added the following text to l66:*

*"These three studies showed that the LS method suffers from significant leakage in the case of power-law spectra which persists even when Multi-Taper Methods (MTM) are used, however, a*

*combination of both the LS and MTM seems to improve on its disadvantages (Springford et al., 2020)."*

### **Gravity waves**

Since the atmosphere is highly nonlinear/turbulent, with Reynolds number of the order of 10<sup>12</sup>, it is not clear why linear gravity wave theory should apply. [4] have argued that in reality, what is observed is a consequence of (high Reynold's number) scaling, intermittent fractional wave equation consistent with stratified Kolomogorov type turbulence. This would explain the existence of wave-like structures in the high Reynold's number limit as well as the observed exponents and their intermittencies. This alternative possibility should be mentioned.

*In the revised manuscript in I137, we have acknowledged the alternative possibility regarding high Reynolds number stratified turbulence in addition to other theories as follows:*

*"While our simulation adopts a simplified linear saturation theory approach through the superposition of sine waves (Dewan and Good, 1986; Smith et al., 1987), we acknowledge that other explanations for the spectral character of GWs exist, including "nonlinear-damping" (Weinstock, 1982, 1990; Gardner, 1994), "Doppler spreading" (Hines, 1991), "saturated-cascade similitude" (Dewan, 1994) and high-Reynolds-number "stratified turbulence" (Pinel and Lovejoy, 2014), see Table.A1 for more details."*

*We recognize that this perspective could offer a more comprehensive understanding of the observed spectral character of gravity waves.*

### **Specific comments:**

The paper is essentially a series of numerical tests of analysis techniques applied to synthetic series with a gap model, I have problems with both. First the simulation method is problematic since it is not clear what the statistics of the resulting series are. Since it is a linear model, it should be nonintermittent (monofractal), and therefore presumably quasi-Gaussian, but this needs clarification. It is not trivial to even theoretically deduce the spectrum from the mathematical definition. Even if one wants to avoid more realistic multifractal models and stick to Gaussian ones, why not use fractional Brownian motion or fractional Gaussian noise that are standard, well-defined processes? At least we would know exactly what we are dealing with in the absence of data gaps and analysis issues!

*The waves that we observe on a given night of observations are not always well described by a standard distribution. Some nights have clearly dominant quasi-monochromatic waves (a reason to have the signal with one frequency simulation in Section 3.1), other nights have a more distributed set of waves. Differences exist in summer vs winter measurements. As well, the observed wave population changes as a function of altitude or in the presence of dominating geophysical flows and features such as the Polar Vortex.*

*Our methodology is driven by the objective of simulating somewhat realistic time series based on our lidar observations. We wanted to control the number of waves, range and distribution of*

*their random frequencies and phases. We tried to reconcile between an idealistic approach based on the superposition of a number of waves but using harmonics of a fundamental frequency which yields a set of waves with a perfectly smooth (but unrealistic) power law spectrum and the approach of fractional Brownian/Gaussian noise which is more realistic but also an idealised paradigmatic model to an extent. In order to make this simulation more realistic and improve its approximation of gravity waves time series, the frequencies are statistically independent with uniformly distributed random values, selected within the range [10min, 6h], which is typical for gravity waves. Each superposed sine wave contributes to the overall signal independently of the others (no interaction), this leads to non-intermittent, monofractal (self-similar) behaviour. Additionally, the sum of these contributions tends to exhibit asymptotically quasi-Gaussian statistics according to the principles of the central limit theorem (Billah and Shinozuka, 1990; Kirchner, 2005). Thus our simulation provides us with appealing characteristics including: random frequencies and phases (due to different gravity wave sources), reasonable number of waves based on observations (see Sica and Russel 1999), quasi-Gaussian statistics (Keisler and Rhyne 1976) and a power law spectrum that resembles that of observed and theoretically predicted spectra. In addition, having Gaussian statistics is only relevant for the Haar Structure Function method, while the other methods are not affected by the simulation statistics.*

*In short, we have presented a simple simulation of sinusoids to better test the tools and simplify the interpretation. Adding more variables also complicates the interpretation of the results. Our goal is to eventually apply this work to observations, of gravity waves, where we know that various processes, such as nonlinearity or intermittency, will affect the resulting spectra. In this case, it will be quite difficult to distinguish whether the change in slope is due to such processes or due to the bias error in the analysis method.*

Also of concern is the gap model. The statistics of the model are perhaps not as clear as they seem. The problem is that when the probability of gaps becomes large enough, many join together to become “supergaps”, ultimately the left-over nongaps - where the data are sampled – may be a fractal set, see Mandelbrot’s “trema” constructions (and theory) in [5]. The thing is that the fractal dimension then becomes a crucial characteristic of the sampling, and thus of the biases. Sampling data with fractal holes/gaps is indeed highly pertinent since it seems to be a fairly general problem with many geophysical data sets. However it requires its own study: how does the fractal dimension of the sampling affect the analyses?

*We agree, “supergaps” exist in observations because they are directly related to observational or experimental problems. Consider, in the case of a lidar, an aircraft passing overhead for 30 seconds or an experimental failure for two hours. Neither of these phenomena can easily be described by multifractal analysis because they are not normally distributed natural phenomena. Our approach reasonably describes both of these kinds of gaps.*

*Clouds could perhaps be described fractally, however, it is unclear how much benefit that would lend the current study. As lidar observationalists, we measure when the sky is mostly clear. As*

*a result, we tend to have random “occasional” gaps from clouds rather than a representative sample of cloud cover.*

*We cite in the manuscript a relevant study to this problem, which was done by Munteanu et al. (2016). They studied the effect of changing the size of a single large gap in the center of the time series with similar spectral characteristics to our simulation. With increasing size of this gap, the spectra of both FFT and DFT exhibit monotonically decreasing amplitudes, while the Z-Transform and Lomb-Scargle show slight increase of the average level of the spectrum. A significant change of the spectral slope was not evidently presented.*

*This is an important remark, we will consider addressing these kinds of fractal gaps and their distributions in future work.*

Haar: I was disappointed that the Haar technique was not further discussed since it is the only one that (largely) avoids most the problems discussed above (I did note that the biases reported in the paper are apparently the smallest for the Haar, as found already in [6] and reiterated in [2]). Although it was mentioned that it is easy to apply to data with gaps, the reference to this nonuniform algorithm should be given (it is in appendix of [7]). The Haar method also allow for the determination of the intermittency corrections (the entire codimension function in fact).

*We are glad to apply the HSF for the first time in our community. Indeed, we have demonstrated that it provides the least biased results compared to commonly used techniques in our field. We have also acknowledged the reference to both the nonuniform algorithm and its ability to determine the moment scaling function  $K(q)$  in the revised manuscript.*

## References

- 1) Lovejoy, S., Scaling, dynamical regimes and stratification: How long does weather last? How big is a cloud? . *Nonlinear Processes in Geophysics* 2023. 30: p. 311–374.
- 2) Hébert, R., K. Rehfeld, and T. Laepple, Comparing estimation techniques for temporal scaling in palaeoclimate time series. *Nonlin. Processes Geophys.*, 2021. 28: p. 311–328.
- 3) Springford, A., G.M. Eadie, and D.J. Thomson, Improving the Lomb–Scargle Periodogram with the Thomson Multitaper. . *The Astronomical Journal.*, 2020. 159 p. 205.
- 4) Pinel, J. and S. Lovejoy, Atmospheric waves as scaling, turbulent phenomena. *Atmos. Chem. Phys.* , 2014. 14: p. 3195–3210.
- 5) Mandelbrot, B.B., *The Fractal Geometry of Nature*. 1982, San Francisco: Freeman.

- 6) Lovejoy, S. and D. Schertzer, Haar wavelets, fluctuations and structure functions: convenient choices for geophysics. *Nonlinear Proc. Geophys.* , 2012. 19: p. 1-14.
- 7) Lovejoy, S., A voyage through scales, a missing quadrillion and why the climate is not what you expect. *Climate Dyn.*, 2015. 44: p. 3187-3210.

*Our References:*

- 1) Lovejoy, S. and Schertzer, D.: *Haar wavelets, fluctuations and structure functions: convenient choices for geophysics*, *Nonlinear Processes in Geophysics*, 19, 513–527, <https://doi.org/10.5194/npg-19-513-2012>, 2012.
- 2) Lovejoy, S.: *A voyage through scales, a missing quadrillion and why the climate is not what you expect*, *Climate Dynamics*, 44, 3187–3210, <https://doi.org/10.1007/s00382-014-2324-0>, 2014
- 3) Springford, A., Eadie, G. M., and Thomson, D. J.: *Improving the Lomb–Scargle Periodogram with the Thomson Multitaper*, *The Astronomical Journal*, 159, 205, <https://doi.org/10.3847/1538-3881/ab7fa1>, 2020.
- 4) Dewan, E. M. and Good, R. E.: *Saturation and the “universal” spectrum for vertical profiles of horizontal scalar winds in the atmosphere*, *Journal of Geophysical Research*, 91, 2742, <https://doi.org/10.1029/jd091id02p02742>, 1986.
- 5) Smith, S. M., Fritts, D. C., and VanZandt, T. E.: *Evidence for a saturated spectrum of atmospheric gravity waves*, *Journal of the Atmospheric Sciences*, 44, 1404–1410, [https://doi.org/10.1175/1520-0469\(1987\)044<1404:EFASSO>2.0.CO;2](https://doi.org/10.1175/1520-0469(1987)044<1404:EFASSO>2.0.CO;2), 1987.
- 6) Weinstock, J.: *Nonlinear Theory of Gravity Waves: Momentum Deposition, Generalized Rayleigh Friction, and Diffusion*, *Journal of Atmospheric Sciences*, 39, 1698 – 1710, [https://doi.org/https://doi.org/10.1175/1520-0469\(1982\)039<1698:NTOGWM>2.0.CO;2](https://doi.org/https://doi.org/10.1175/1520-0469(1982)039<1698:NTOGWM>2.0.CO;2), 1982.
- 7) Weinstock, J.: *Saturated and unsaturated spectra of gravity waves and scale-dependent diffusion*, *Journal of the Atmospheric Sciences*, 47, 2211–2226, [https://doi.org/10.1175/1520-0469\(1990\)047<2211:SAUSOG>2.0.CO;2](https://doi.org/10.1175/1520-0469(1990)047<2211:SAUSOG>2.0.CO;2), 1990
- 8) Gardner, C. S.: *Diffusive filtering theory of gravity wave spectra in the atmosphere*, *Journal of Geophysical Research*, 99, 20 601, <https://doi.org/10.1029/94jd00819>, 1994.
- 9) Hines, C. O.: *The Saturation of Gravity Waves in the Middle Atmosphere. Part II: Development Of Doppler-Spread Theory*, *Journal of the Atmospheric Sciences*, 48, 1361–1379, [https://doi.org/10.1175/1520-0469\(1991\)048<1361:TSOGWI>2.0.CO;2](https://doi.org/10.1175/1520-0469(1991)048<1361:TSOGWI>2.0.CO;2), 1991.
- 10) Dewan, E.: *The saturated-cascade model for atmospheric gravity wave spectra, and the wavelength-period (W-P) relations*, *Geophysical Research Letters*, 21, 817–820, <https://doi.org/10.1029/94gl00702>, 1994.
- 11) Pinel, J. and Lovejoy, S.: *Atmospheric waves as scaling, turbulent phenomena*, *Atmospheric Chemistry and Physics*, 14, 3195–3210, 2014.
- 12) Billah, K. Y. R. and Shinozuka, M.: *Numerical method for colored-noise generation and its application to a bistable system*, *Phys. Rev. A*, 42, 7492–7495, <https://doi.org/10.1103/PhysRevA.42.7492>, 1990



- 13) Kirchner, J. W.: *Aliasing in  $1/f$   $\alpha$  noise spectra: Origins, consequences, and remedies*, *Phys. Rev. E*, 71, 066 110, <https://doi.org/10.1103/PhysRevE.71.066110>, 2005.
- 14) Sica, R. J. and Russell, A. G.: *How many waves are in the gravity wave spectrum?*, *Geophysical Research Letters*, 26, 3617–3620, <https://doi.org/10.1029/1999gl003683>, 1999.
- 15) Keisler, S. R. and Rhyne, R. H.: *An assessment of prewhitening in estimating power spectra of atmospheric turbulence at long wavelengths*, Tech. rep., NASA Langley Research Center, <https://ntrs.nasa.gov/api/citations/19770005667/downloads/19770005667.pdf>, 1976.
- 16) Munteanu, C., Negrea, C., Echim, M., and Mursula, K.: *Effect of data gaps: comparison of different spectral analysis methods*, *Annales Geophysicae*, 34, 437–449, <https://doi.org/10.5194/angeo-34-437-2016>, 2016.

# Assessing Atmospheric Gravity Wave Spectra in the Presence of Observational Gaps

Mohamed Mossad <sup>1</sup>, Irina Strelnikova <sup>1</sup>, Robin Wing <sup>1</sup>, and Gerd Baumgarten <sup>1</sup>

<sup>1</sup>Leibniz Institute for atmospheric physics, Kühlungsborn, DE

**Correspondence:** Mohamed Mossad (mossad@iap-kborn.de)

**Abstract.** We present a thorough investigation into the accuracy and reliability of gravity wave (GW) spectral estimation methods when dealing with observational gaps. GWs have a significant impact on atmospheric dynamics, exerting influence over weather and climate patterns. However, empirical atmospheric measurements often suffer from data gaps caused by various factors, leading to biased estimations of the spectral power-law exponent ( ~~$\beta$ -slope~~)  $\beta$ . This exponent describes how the energy of GWs changes with frequency over a defined range of GW scales. In this study, we meticulously evaluate three commonly employed estimation methods: the Fast Fourier Transform (FFT), Generalised Lomb-Scargle periodogram (GLS), and Haar Structure Function (HSF). We assess their performance using time series of synthetic observational data with varying levels of complexity, ranging from a ~~single sinusoid to~~ signal with one frequency to a number of superposed sinusoids with randomly distributed wave parameters. By providing a comprehensive analysis of the advantages and limitations of these methods, our aim is to provide a valuable roadmap for selecting the most suitable approach for accurate estimations of  $\beta$  from sparse observational datasets.

**Keywords.** spectra, gravity waves, lidar, Lomb Scargle, Fourier, Haar

## 1 Introduction

Gravity waves (GWs) are ubiquitous phenomena that play a crucial role in the dynamics of the Earth's atmosphere, where they impact weather and climate patterns (Hines, 1960; Ern et al., 2018). Various sources, including convection, topography, and jet streams generate these waves (Crowley and Williams, 1987; Fritts, 1989). As they propagate through the atmosphere, they can break and mix with the surrounding atmosphere, redistributing their energy and momentum. This leads to significant changes in the atmospheric thermodynamics and large-scale circulation patterns of the atmosphere, including wind speeds and temperature gradients (Lindzen, 1981; Holton, 1983; Fritts and Alexander, 2003). Observations of these meteorological variables reveal that GWs exist for the most part in the form of a spectrum of superposed waves within a wave packet, and occasionally as quasi-monochromatic waves (Maekawa et al., 1984; Eckermann and Hocking, 1989). To understand the physical processes



that govern the generation, propagation, and dissipation of these wave packets, it is often useful to examine their spectral properties such as their frequencies, amplitudes, and scales (Axford, 1971; Fritts and VanZandt, 1993).

On that note, VanZandt first introduced the concept of a 'universal atmospheric GW spectrum' (VanZandt, 1982). This spectrum facilitated efficient parameterizations of how GWs affect the mean atmospheric state (Babu et al., 2008). For instance, the spectra of GWs are often used in model parameterization, including source spectra parameterization, Lagrangian spectral parameterization, and subgrid-scale parameterization, enabling the simulation of the dynamics of the middle and upper atmospheres (Beres et al., 2005; Song and Chun, 2008; Houchi et al., 2010). Overall, accurate predictions of GW activity can improve weather forecasting, while they contribute significantly to climate modelling in parameterizing physical processes like turbulence and mixing (Alexander et al., 2002; Smith, 2012; Liu et al., 2014).

This ~~universal~~-GW spectrum exhibits a power law scaled by an exponent (or slope)  $\beta$ , which describes the rate at which wave energy changes with its wave number (or frequency). The basis for this spectrum for atmospheric GWs is not only supported by a strong foundation in theoretical works (Dewan and Good, 1986; Weinstock, 1990; Hines, 1991; Dewan, 1994; Gardner, 1994), but also in observational studies (Smith et al., 1987; Fritts et al., 1988; Gardner et al., 1995; Nastrom et al., 1997; Zhang et al., 2006, 2017). These values of  $\beta$  do not only depend on the type of spectra (e.g. temporal, horizontal, or vertical wavenumber) but also the geophysical variables measured (e.g. temperature, horizontal or vertical wind etc.), see Tab. A1 for a summary. Thus, an accurate estimation of  $\beta$  is essential to validate different theoretical predictions of GW power spectral densities (PSD) (Dewan and Grossbard, 2000), and improve climate models and weather forecasts (Lindgren et al., 2020).

Determining  $\beta$  from empirical atmospheric measurements is challenging due to various factors, such as the inevitable presence of data gaps, observational noise, and the finiteness of data length and resolution. Data gaps can occur for numerous reasons, including: instrumental errors, data transmission issues (e.g. due to weather conditions like clouds in the case of lidar), and signal interference (in the case of radar). When gaps exist in multiscale time series, data points representing certain frequencies are lost, which distorts the spectra and introduces significant bias in the estimation of  $\beta$  (Brown and Christensen-Dalsgaard, 1990; Rigling, 2012). To minimise the effect of these gaps on the spectra, data-filling schemes are often applied. Though linear interpolation is usually used to fill in these gaps (Meisel, 1978; Lepot et al., 2017), even adaptively implemented interpolators produce artefacts into the time series at low gap percentages (GPs), which contribute additional bias in the spectra (Schulz and Stattegger, 1997; Hall and Aso, 1999). Bias in spectral estimates can also be caused by other relevant sources, such as spectral leakage, steep spectra ( $\beta > 2$ ), and in-signal components with larger periods than the observed time span  $T$  (Klis, 1994).

In this paper, we systematically quantify the advantages and limitations of estimation methods of GW spectra in handling these error sources. We also propose a procedure for selecting unambiguously suitable methods for  $\beta$  estimation. Even though this study is motivated by the analysis of atmospheric GWs, the conclusions and the methods can be generalised to different fields with similar time series characteristics such as astronomy and seismology. Two commonly used methods are considered, namely the Fast Fourier Transform (FFT) (Cooley and Tukey, 1965) and the Generalised Lomb-Scargle periodogram (GLS) (Zechmeister and Kürster, 2009), as well as the fairly recent Haar Structure Function (HSF) (Lovejoy and Schertzer, 2012). The FFT is the standard method to analyse spectra of evenly sampled data, ~~while the~~. The Lomb-Scargle periodogram (LS) was used in many studies as the main analysis method (or as a reference) of GW spectra (e.g., Hall and Aso, 1999; Zhang et al., 2006; Guharay a

. As far as the authors are aware, the HSF has never been used in atmospheric GW studies. Both the GLS and HSF are specifically known to handle unevenly sampled data. In an effort to closely mimic real observations of GWs, we simulate time series data with varied levels of complexity, beginning with ~~signals consisting of single sinusoids~~ a signal with one frequency and  
60 increasing in complexity to a superposition of sinusoids with randomly distributed ~~seales (and frequencies)~~ frequencies (and phases).

Previous studies have investigated these spectral methods and others for estimating power-law spectra and compared their performance on synthetic and observed data. For instance, Zhan et al. found that using FFT of linearly interpolated signals is the best approach to analyse radar wind data at 50% GP (only for the case of  $\beta = 5/3$ ) compared to the correlogram and  
65 ~~Lomb-Scargle (LS)~~ the LS (Zhan et al., 1996). However, a quantitative analysis of the effect of changing  $\beta$  or the GP was not conducted. Similarly, Munteanu et al. showed that FFT outperforms LS, Z-Transform, and Discrete Fourier Transform in estimating  $\beta$  from Venus' magnetic field data (Munteanu et al., 2016). Although, the effect of changing  $\beta$  was not considered either since the power-law spectra were not simulated. In contrast, Hébert et al. found that the HSF consistently surpassed other methods in estimating  $\beta$ , without the need to interpolate the gapped (simulated paleoclimate) data for  $\beta \in (0, 3)$ , except the  
70 case of  $\beta \in (-1, 0)$ , where they concluded that LS would be the best option (Hébert et al., 2021). Nonetheless, the impact of altering the GP was not quantitatively presented, instead, the skewness of the gaps (Gamma) distribution was used as a parameter to refer to the irregularity of the time series. These three studies showed that the LS method suffers from significant leakage in the case of power-law spectra which persists even when Multi-Taper Methods (MTM) are used, however, a combination of both the LS and MTM seems to improve on its disadvantages (Springford et al., 2020).

75 The rest of the paper is organised as follows: in Sect. 2, we describe the methods used in our study, including a description of FFT, GLS, and HSF. In Sect. 3 we introduce the data simulation procedures. In Sect. 4 we discuss data processing. In Sect. 5 we present the results of our simulations, comparing the performance of these methods in different scenarios. In Sect. 6 we discuss the implications of our findings, and provide recommendations for spectral analysis of GW time series with data gaps. Finally, in Sect. 7, we present a summary of our relevant results and conclusions.

## 80 2 Spectral Methods

### 2.1 The Fast Fourier Transform

The FFT is the most commonly used method for estimating frequency spectra of evenly sampled data (Cooley and Tukey, 1965). It enables the approximation of a time series sampled from a continuous distribution over discrete time steps, through a series of complex sine and cosine waves with varying frequencies. Under the assumption of a unit sample interval, the  
85 (forward) FFT transforms a time series  $z_n$  of length  $N$  from its original domain (time or space) into a set of coefficients  $Z_k$  in the (temporal or spatial) frequency domain by employing the relation:

$$Z_k = \sum_{n=0}^{N-1} z_n e^{-2\pi i k n / N}, \quad k = 0, 1, \dots, N-1. \quad (1)$$

In our work, the FFT will serve as the benchmark spectral estimation method. The expected Fourier transform of a discretized signal is given by the convolution of the true transform and the transform of a Dirac comb window function designating those measurement times (Vanderplas, 2018). In the case of gapped data, the symmetry in the Dirac comb is destroyed, causing the resulting transform to be noisy with incorrect peak positions and heights. Consequently, the true transform of gapped data will not be recoverable. This disadvantage can be bypassed by applying data reconstruction methods such as interpolation, sparse approximation, etc., to approximate the true Fourier transform (Babu and Stoica, 2010). Unfortunately, these reconstruction methods can introduce artefacts to the signal, which depend on the distribution of the gaps and their sizes (Munteanu et al., 2016).

## 2.2 The Generalised Lomb-Scargle Periodogram

The GLS periodogram developed by Zechmeister and Kuerster offers a method for estimation of the PSD of unevenly sampled time series (Zechmeister and Kürster, 2009). It is a generalisation of Lomb’s least-squares approach (Lomb, 1976) which is equivalent to the modified Schuster’s periodogram (Schuster, 1898; Scargle, 1982) (based on the FFT) in the case of evenly sampled data. The GLS produces a spectrum by least-squares fitting a model of a weighted sinusoid given by

$$y(t) = a \cos \omega t + b \sin \omega t + c \quad (2)$$

to the time series at each sampled frequency  $\omega$ . The offset  $c$  compensates for the assumption that the mean of the time series  $\bar{z}$  is equal to the mean of the fit  $\bar{y}$ . This floating-mean approach is advantageous, considering that the mean of a periodic signal may change statistically, especially for small  $N$  (Ferraz-Mello, 1981). Furthermore, the purpose of using weighted sums is to account for the observational noise for which the original LS does not.

The LS method has often been used to seek dominant periodic frequencies or cycles (Zhang et al., 1993; Pichon et al., 2015; Rao et al., 2017), analyse seasonal changes of significant modulations of GW fields (Beldon and Mitchell, 2010), and estimate the spectral indices  $\beta$  and amplitudes of GW power-law spectra (Hall and Aso, 1999; Zhang et al., 2006; Guharay and Sekar, 2011; Qing et al., 2014). In addition, LS is known as the most efficient method for estimating the variance in both gapped and non-gapped stationary time series with a ~~single-sinusoidal~~ single periodicity, without the need to fill in missing data (Marinna et al., 2019). In contrast, Vio et al. found that the LS is neither reliable for analysing semi-periodic nor aperiodic signals with non-stationary noise or signals made of more than one ~~sinusoid~~ wave, without additional steps (Vio et al., 2010).

## 2.3 The Haar Structure Function

The HSF is a mathematical tool used in conducting scaling analysis of signals (Lovejoy and Schertzer, 2012), which is based on the Haar wavelet (Haar, 1910). It is a simple yet powerful method for decomposing a signal  $x(t)$  whose power spectral density exhibits a power law, i.e.  $\text{PSD} \propto \tau^H$  with a scaling (Hurst) exponent  $H$ , over a scale (lag)  $\tau = 1/f$ , into fluctuations

$\Delta x = x(t + \tau) - x(t)$ . The first-order Haar fluctuations  $\mathcal{H}_\tau$  at a lag  $\tau$  are defined by the relation:

$$\mathcal{H}_\tau(x(t')) = \frac{2}{\tau} \left| \sum_{t+\frac{\tau}{2} < t' < t+\tau} x(t') - \sum_{t < t' < t+\frac{\tau}{2}} x(t') \right| \quad (3)$$

- 120 The  $q$ -th order structure function  $S_q(\tau)$  is then obtained as an approximation by ensemble averaging these fluctuations as follows:

$$S_{\mathcal{H},q=1}(\tau) = \langle \mathcal{H}_\tau(x(t)) \rangle \approx \tau^{qH-K(q)} \quad (4)$$

In the quasi-Gaussian case, the moment scaling function is  $K(q) \approx 0$ , so for the first-order structure function ( $q = 1$ ), only  $H$  determines the scaling of mean fluctuations.

- 125 A power spectrum which follows a ~~power-law~~ PSD  $\propto \tau^\beta$  is related to the Hurst exponent by  $\beta = 1 + 2H - K(2)$ , here  $q = 2$  because the power spectral density is a second-order moment. Thus, under ~~the~~ quasi-Gaussian approximation, we re-scaled the HSF to a comparable scale to the PSD using the relation:

$$S_{\mathcal{H},q=1} \propto \tau^H \approx \tau^{\frac{\beta-1}{2}} \quad (5a)$$

$$S_{\mathcal{H},q=1} \cdot \tau^{1/2} \propto \tau^{\beta/2} \quad (5b)$$

- 130  $S_{\mathcal{H},q=1}^2 \cdot \tau \propto \tau^\beta \propto \text{PSD}$  . (5c)

Despite that the term  $K(2)$  is fairly small, it is nontrivial in the non-Gaussian case and higher moments  $q$ , and the HSF allows for its calculation (Lovejoy and Schertzer, 2012), but this is beyond the scope of this paper. The HSF is particularly suitable for estimating the scaling exponent of time series with  $H \in (-1, 1)$  or  $\beta \in (-1, 3)$ . This range of  $\beta$  values covers the vast majority of atmospheric processes from weather (where  $\tau < 10$  days, and  $1 < \beta < 3$ ) to macroweather systems (where  
 135  $10 \text{ days} < \tau < 10 - 30 \text{ yr}$ , and  $-1 < \beta < 1$ ). The HSF also possesses the advantage of handling unevenly sampled data, which is a consequence of the fact that it is computed by taking the mean of absolute fluctuations (Lovejoy, 2014). Nevertheless, the HSF is not employed to estimate the ~~amplitude or the frequency of sinusoids~~ frequency of a wave or its amplitude, since it only measures how much frequency components contribute to the total variance. The Python code implementation of the HSF is readily accessible (Mossad, 2023), which was derived from the R code originally developed by Raphaël Hébert (Hébert, 2021).

### 140 3 Data Simulation

In this section, we present the simulation procedures used to generate time series similar to actual GWs measurements. In measurements, GWs can exhibit various behaviours, ranging from superposed waves within wave packets with multiple frequencies, amplitudes, and phases to more coherent quasi-monochromatic waves (Maekawa et al., 1984; Eckermann and Hock-

ing, 1989; Sica and Russell, 1999). In Sect. 3.1, we simulate ~~single sinusoids~~ signals each with one frequency to mimic  
 145 quasi-monochromatic waves, in which the goal is to accurately estimate the correct frequency and amplitude of each sig-  
 nal. In Sect. 3.2, however, we simulate time series composed of a superposition of ~~scales and amplitudes. This simulation~~  
~~allows us to produce spectra which follow power laws, whose exponents~~ waves with random frequencies and power-law  
amplitudes. The exponents/slopes  $\beta$  of their power-law spectra are used to assess the bias of the spectral analysis meth-  
 ods. While our simulation adopts a simplified linear saturation theory approach through the superposition of sine waves  
 150 (Dewan and Good, 1986; Smith et al., 1987), we acknowledge that other explanations for the spectral character of GWs exist,  
including "nonlinear-damping" (Weinstock, 1982, 1990; Gardner, 1994), "Doppler spreading" (Hines, 1991), "saturated-cascade  
similitude" (Dewan, 1994) and high-Reynolds-number "stratified turbulence" (Pinel and Lovejoy, 2014), see Table.A1 for more  
details.

By analysing both simulations, we can determine the accuracy of each of the methods at different levels of signal complexity,  
 155 and identify potential limitations and sources of error in the analysis of GWs spectra. Random gaps are then introduced to re-  
 semble observational gaps for both simulations. The units and values of the variables used in this simulation have been chosen  
 to represent average values or ranges characteristic of typical GW time series.

### 3.1 ~~Single-Sinusoid~~ Single-Frequency Signal Simulation

Quasi-monochromatic GWs can be observed under specific conditions where a single frequency dominates other components  
 160 (Muraoka et al., 1988; Swenson et al., 1999). This kind of GWs can be approximated as an evenly sampled single sinusoid  
 $x(t) = A \sin(2\pi ft + \varphi)$  with a known frequency  $f$ , phase shift  $\varphi$ , and amplitude  $A$ , at time  $t$ . For both simulations, the time  
 resolution  $\Delta t$  is 5 min with a total span of  $T = 6$  h, as this resolution and duration align with the average values of lidar  
 measurements commonly used in atmospheric studies (Gardner et al., 1995; Gerding et al., 2008). As a result, the number of  
 points  $N$  in each signal is equal to  $\frac{T}{\Delta t} = 72$ . Each simulated sinusoid has an ~~arbitrary~~ amplitude of  $A = 4$  K and a randomly  
 165 chosen frequency  $f$  from the set  $1/\{6, 3, 1.5, 1, 0.5, 1/3\} [\text{h}^{-1}]$ . Changing the frequency serves as a test to examine whether the  
 bias of the methods is frequency-dependent. The phase shift  $\varphi$  is also randomly chosen ~~but~~ from a uniform distribution within  
 the interval  $[0, 2\pi]$ .

The amplitude of the time series is equivalent to the estimated height of the main peak in the spectrum. It is computed from  
 the FFT coefficients (Eq. 1) as  $A_{\text{FFT}} = \max_k \left( \frac{2|Z_k|}{N} \right)$  and from the GLS fit coefficients (Eq. 2) as  $A_{\text{GLS}} = \max_k \left( \sqrt{a_k^2 + b_k^2} \right)$ .  
 170 The frequency of that peak  $f_k$  corresponds to the estimated frequency of the signal. As a metric for the accuracy of estimation  
 of the true values of frequencies and amplitudes, we used the relative bias given by:

$$\text{Relative bias} = \frac{\text{value estimated} - \text{value expected}}{\text{value expected}} . \quad (6)$$

Since real data is susceptible to observational noise, it is crucial to consider the case where white noise is added to the sim-  
 ulated signal as a random variable  $r(t)$  from a standard normal distribution. Here, the signal-to-noise ratio is defined by  
 175  $\text{SNR} = A^2/2\sigma_r^2$ , where  $\sigma_r^2$  is the noise variance (Horne and Baliunas, 1986). To strike an appropriate balance between captur-

ing meaningful noise characteristics and minimising low SNR bias, an average SNR value of 8 is chosen for this simulation.

### 3.2 Spectral Power Law Simulation

As reported before (see Table A1), the **universal**-spectra of GWs are characterised by a power law, i.e.  $\text{PSD} \propto 1/f^\beta$  (in the case of spatial data,  $\text{PSD} \propto 1/(k,l,m)^\beta$  where  $k,l,m$  are horizontal and vertical wavenumbers). On that account, we are interested in estimating the value of  $\beta$  of simulated time series whose spectra would have  $\beta \in \{-1, 0, 1, 5/3, 2, 2.5, 3\}$  and comparing it with the true value. The simulated evenly sampled time series  $x(t)$  consists of a sum of  $M$  sinusoids, each with frequency  $f_i$  and **power-law power-law** amplitudes,  $A_i = f_i^{-\beta}$  as follows (~~Rice, 1944~~) (Rice, 1944; Billah and Shinozuka, 1990; Kirchner, 2005)

$$x(t) \sim \sum_i^M \sqrt{A_i} \sin(2\pi f_i t + \varphi_i) = \sum_i^M (f_i)^{-\beta/2} \sin(2\pi(f_i)t + \varphi_i) \quad . \quad (7)$$

We used for our simulation  $M = 35$  for each time series. It is driven by the objective of reconciling the inclusion of a minimum of 20 waves based on observational (Sica and Russell, 1999) and modelling suggestions (Dewan, 1994; Hamilton, 1997), while simultaneously incorporating a sufficiently large number of waves to mitigate random spectral errors (~~Keisler and Rhyne, 1976~~) (Keisler and Rhyne, 1976; Shinozuka, 2005). This approach enables the demonstration of the **power-law power-law** spectrum without the need for excessive averaging. The frequencies  $f_i$  are statistically independent uniformly distributed random values, selected within the range  $[\frac{1}{T}, \frac{1}{2\Delta t}] = [\frac{1}{6\text{h}}, \frac{1}{10\text{min}}]$ . Hence, the time series is composed of non-harmonic components and there are no favoured frequencies, which is a better approximation of atmospheric GWs than an idealistic case where frequencies are only integer multiples of a fundamental frequency. Here,  $x(t)$  is proportional to the square root of the amplitudes  $A_i$  since  $\beta$  is estimated from PSD-normalised spectra, which are the squared modulus of the amplitudes.

The PSD is obtained by the FFT using the relation  $\frac{2Z_k Z_k^* \Delta t}{N}$ , where  $Z_k^*$  is the complex conjugate of  $Z_k$ . This definition is equivalent to the GLS spectrum  $\frac{N|a_k^2 + b_k^2| \Delta t}{2}$  of evenly sampled data. The HSF is however normalized according to Eq. 5c to estimate a comparable scale to the PSD. The bias of  $\beta$  estimation is defined for this simulation as

$$\beta \text{ bias} = \text{value estimated} - \text{value expected} \quad . \quad (8)$$

### 3.3 Gaps Simulation

After creating a time series with the desired spectral properties, gaps are introduced by randomly removing data points (except both endpoints), assuming that all data points are equally probable to be removed (i.e. a uniform distribution). Based on the simulated GP  $p$  in the data, an integer number of random points  $N_G = N - \frac{N \cdot p}{100}$   $N_G \approx \frac{N \cdot p}{100}$  is removed. Thus, a 0% GP means that no points were removed, while a 50% GP means that 36 points were randomly removed, since  $N = 72$ . To assess the dependence of bias in spectral analysis methods on the gaps, we conducted simulation runs spanning GPs ranging from 0% to

205 90% in increments of 10% for each time series analysed. Each of these simulation runs was repeated 1000 times at each GP increment to ensure the statistical significance of our results since the frequencies, phases, and gaps are randomised. Then we computed the average values of the estimated amplitude and period (for the ~~single-sinusoid~~ single-frequency signal simulation), and  $\beta$  (for the spectral ~~power-law~~ power-law simulation).

#### 4 Processing Steps

210 Before applying spectral methods on the generated time series from the simulations in Sec.3, the following steps are taken:

- The time series is first interpolated using the original time step 5 min, this is only necessary for FFT.
- The mean of the signal  $\bar{z}$  is subtracted to account for the zero-frequency component of the Fourier transform  $Z_0$ .

When computing the spectrum for a time step  $\Delta t$ , the frequency grids of all methods are defined as follows:

- The frequency range spans from  $\frac{1}{T}$  to  $\frac{1}{2\Delta t}$ .
- 215 - The frequency spacing is given by  $\Delta f = \frac{1}{T}$ .

In the presence of gaps where  $\Delta t$  is not constant, the Nyquist frequency is then defined as:

- $f_{Ny} = \frac{1}{2p}$ , where  $p$  is the largest value that allows  $t_i = t_0 + n_i p$  to be possible for all  $t_i$ , and  $n_i$  are integers (Eyer and Bartholdi, 1999). This value corresponds to the same Nyquist frequency of our non-gapped data, which is  $0.1 \text{ min}^{-1}$ .
- This approach is more appropriate for GLS and HSF than applying a "pseudo-Nyquist" limit based on an average or a  
220 minimum value of  $\Delta t$  (Scargle, 1982; Vanderplas, 2018).

To estimate  $\beta$ , the spectra are fitted by taking the following steps:

- A maximum likelihood estimator (MLE) is employed to determine the fit parameter  $\beta$  (Duvall and Harvey, 1986).
- The MLE fit involves minimising the negative log-likelihood function  ~~$-\ln L(\vec{\theta})$~~   $-\ln L(O)$  of observations  $O_i$  at frequency  $f_i$  using the equation:

$$225 \quad \underline{-\ln L(\vec{\theta})} \underline{\ln L(O)} = \sum_{i=1}^n \ln \langle O_i \rangle + \frac{O_i}{\langle O_i \rangle} \quad , \quad (9)$$

where  $\langle O_i \rangle$  refers to the ~~power-law~~ power-law model  $c(\frac{1}{f^\beta})$  being fitted, with  $c$  as a normalisation coefficient (Duvall and Harvey, 1986).

- The MLE fit is recommended over least squares regression because the latter assumes a Gaussian distribution of periodogram residuals, leading to a biased estimate of  $\beta$  (Clauset et al., 2009).



### 5.1 Single-Sinusoid Single-Frequency Signal

First, we show an example of the time series generated by the simulation described in Sect.3.1, which consists of a 0.5 h-wave in a 6-hour time series. As can be seen in Fig.1a, in the absence of gaps, an accurate estimation of the 4 K amplitude and the 0.5 h period of this signal is acquired by both the GLS and FFT. In addition, the spectra obtained by the FFT and GLS are (as expected) equivalent in the case of evenly sampled data (Scargle, 1982). When the random gaps replaced 50% of the data points, a significant difference between the amplitude spectra is observed, see Fig.1b. Both methods still provide an accurate estimate of the signal's period. Linear interpolation of the 50% gapped signal preserves the structure of the wave but loses some of the high-frequency components, which leads to a significant underestimation of the amplitude by 43% in the FFT spectrum. In contrast, the amplitude of the highest peak in the GLS spectrum is not affected by the gaps and has not changed from the expected value.

When comparing average relative period bias for different simulation periods, Fig.2a shows that GLS demonstrates no period

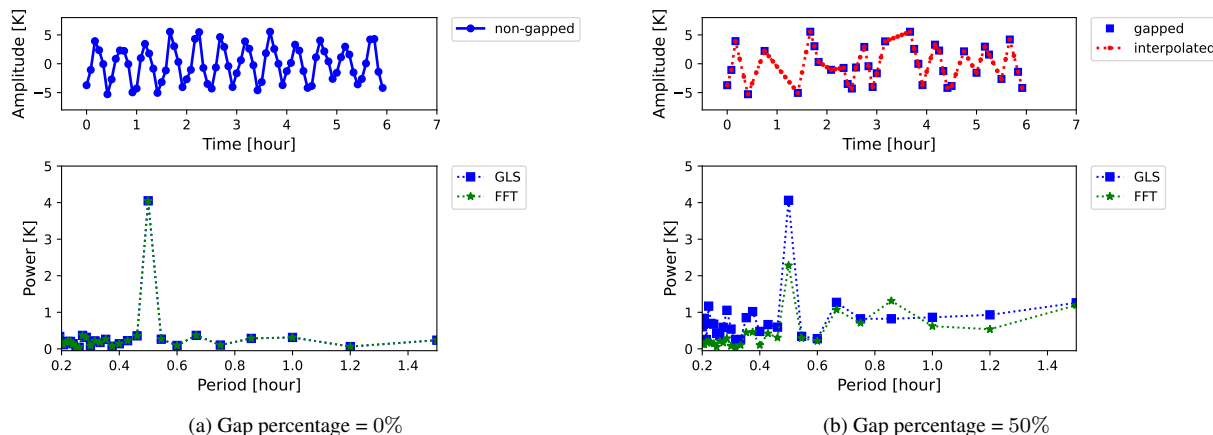

**Figure 1.** Time series of a 0.5 h-wave in a 6-hour observation time generated according to Sect.3.1. (a) shows the time series (upper left) and its temporal amplitude spectrum (lower left) in the absence of gaps. (b) shows the time series (upper right) and its temporal amplitude spectrum (lower right) after the addition of random gaps.

bias below 80% GP and a negligible bias beyond (within  $\pm 20\%$  deviation interval). Fig.2b shows, contrarily, that the smaller the simulated period of the signal, the more FFT overestimates it at GPs larger than 40%. This is due to linear interpolation replacing the removed high-frequency components with lower-frequency ones (i.e., aliasing), which eventually dominate as the GP gradually increases. To put these results in perspective, at 70% GP, FFT inaccurately determines the period of a 0.5 h wave as 2.93 h (i.e. overestimates it by 486%). Given that there are quite few data points left in the time series at 70% GP, it is expected that FFT is not able to recover the correct period, however, GLS is still capable of obtaining the exact value of the period (i.e., an error of 0%). Not only is the GLS a much better estimator of the period on average, but also since its standard deviation remains trivially small until 80% GP, it is a more reliable choice on a case-by-case basis as well.

Similarly, the FFT's amplitude bias experiences clear dependency on the frequency of the signal, while GLS demonstrates a

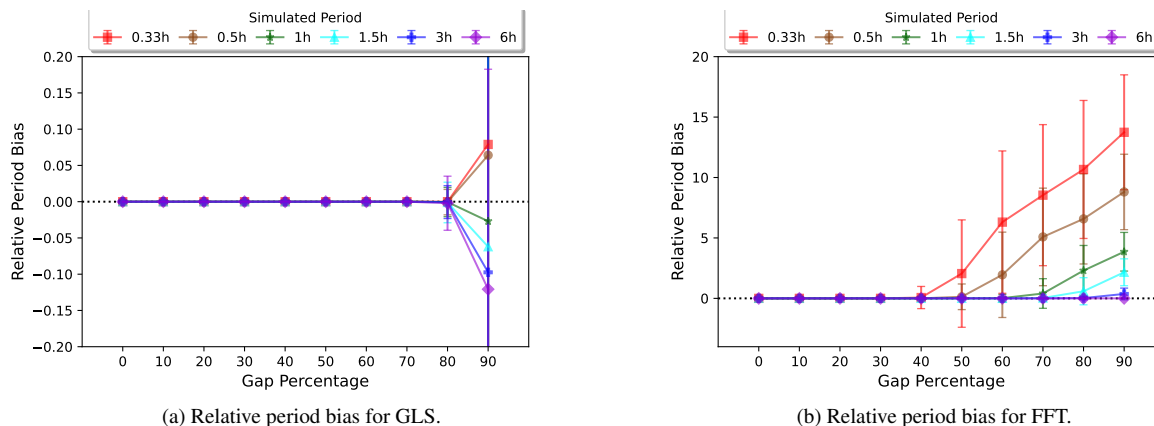

**Figure 2.** Comparison of relative period bias (Eq.6) as a function of gap percentage for each method, here shown for each simulated period (frequency). The bias is estimated from the average estimated values of the periods, and its standard deviation is scaled accordingly. Note that the y-axis (relative period bias) is limited between  $[-0.2, 0.2]$  for the GLS and  $[-4, 20]$  for FFT. This shows how extremely different the accuracy of each method is.

250

negligible amplitude bias at GP below 80%, see Fig.3. In particular, the results show that the mean estimated amplitude from the FFT spectrum deviates exponentially from the expected value as the frequency of the signal increases, even at gap percentages below 50%. In addition, the standard deviation of amplitude estimation by GLS increases as the GP increases, although it remains within  $\pm 10\%$  deviation interval up to 80% GP. On the contrary, the standard deviation of amplitude estimation by

255 FFT significantly increases as both the frequency of the signal and GP increase, implying that FFT is more inconsistent and highly sensitive to missing data, especially for high-frequency signals.

Overall, GLS provides a more robust estimation of the period and amplitude of gapped time series, while the FFT's performance is simultaneously dependent on the GP and frequency of the signal.

## 260 5.2 Spectral Power Law Signal

A time series example is shown in Fig.4 to illustrate the complexity of a signal produced according to Sect. 3.2 for  $\beta = 2$ , showcasing the signal before and after the introduction of gaps. As the percentage of gaps in the data increases, the impact on the spectral components varies depending on their frequency range. High-frequency components (rapid fluctuations over short periods) are most vulnerable when data is being removed. Subsequently, the lower frequency components (slow variations over

265 longer periods) follow, exhibiting greater resilience to data gaps. In essence, a considerably greater number of gaps is required to significantly affect the estimation of the latter. A distorted spectrum of this time series can be seen, which is a result of the limited sample length and resolution (Roberts et al., 1987). In addition, as the signal comprises numerous sinusoids-waves with random frequencies, the presence of closely spaced frequencies leads to the emergence of complex and broad peaks in the

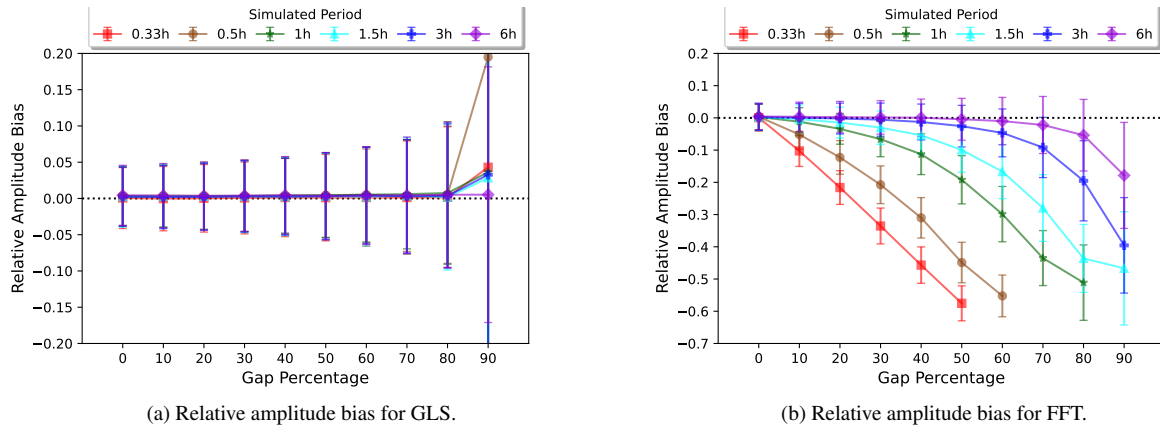

**Figure 3.** Comparison of relative amplitude bias (Eq. 6) as a function of gap percentage for each method, here shown for each simulated period (frequency). According to Fig.2b, past a certain GP threshold, the highest peak in the FFT spectrum does not belong to the true frequency but to meaningless interpolation noise. For this reason, the amplitude bias reported in Fig.3 is limited by relative period bias  $< 3$ , since amplitude values beyond this threshold should not be relied upon. Note that the upper and lower limits of the y-axis are different for each method as well.

spectrum (Horne and Baliunas, 1986; Dewan and Grossbard, 2000).

In the absence of gaps, the true value of  $\beta$  is accurately estimated from the spectra of all methods (see Fig.4a). However,

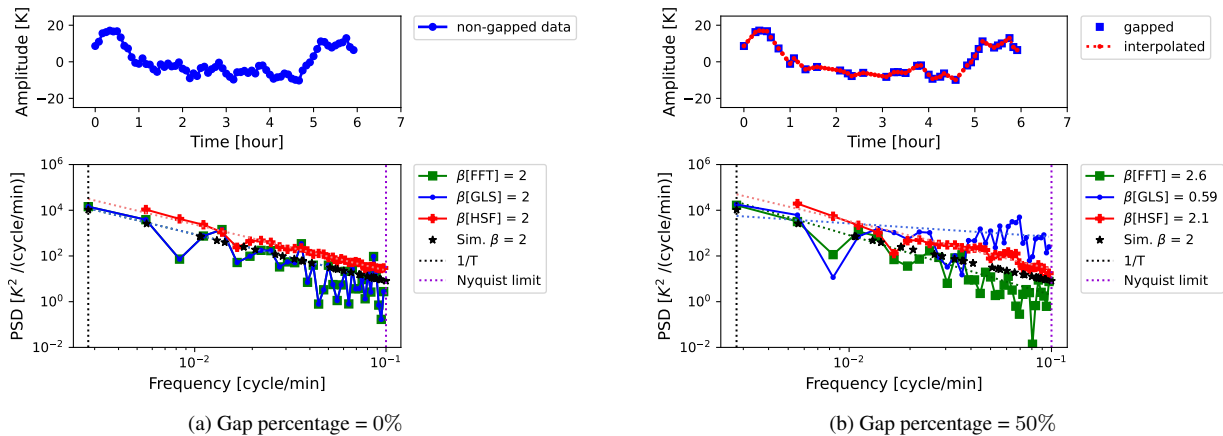

**Figure 4.** A time-series example (upper left and right) generated by the spectral **power-law-power-law** simulation (according to Sect.3.2) with a spectral exponent of  $\beta = 2$  within a 6-hour observation time, before and after the addition of gaps, respectively. The estimated power spectral densities of both non-gapped and gapped time series are shown in the lower left and right. Here, both x- and y-axes in the spectra figures were log-scaled so that a linear function can be identified. The dotted lines (in red, green and blue) represent the fits of the PSD of each method.

270

after removing 50% of the data points (Fig.4b), the estimated spectrum by the HSF remains relatively unaltered while the GLS and **HSF-FFT** spectra diverge. The overestimation of  $\beta$  (bias= 0.6) by FFT is due to the amplitudes of high-frequency components being underestimated, which is a result of the interpolation (Schulz and Stattegger, 1997; Hall and Aso, 1999).

275 ~~An even smaller bias (0.1) results in the~~ This overestimation of  $\beta$  can also be explained by the fact that these interpolated  
 (high-frequency) components contribute locally by  $\beta = 3$  to the overall slope of the spectrum which result in positive bias  
 when the true  $\beta$  is less than 3 (Lovejoy, 2014). In the case of the HSF, where no interpolation of the signal is done, an even  
 smaller bias (0.1) results. In contrast, the true power law can be seen for the first few low frequencies in the GLS spectrum,  
 then it starts to flatten at intermediate and high frequencies with a substantial bias of  $-1.41$ . This occurs because the lack of  
 280 data points constrains the least squares fit by GLS, which leads to the interpolation of power at these frequencies (i.e., a flat  
 line).

For a statistically significant picture, we show the distributions of estimated  $\beta$  values from 1000 simulation runs in Fig.5.

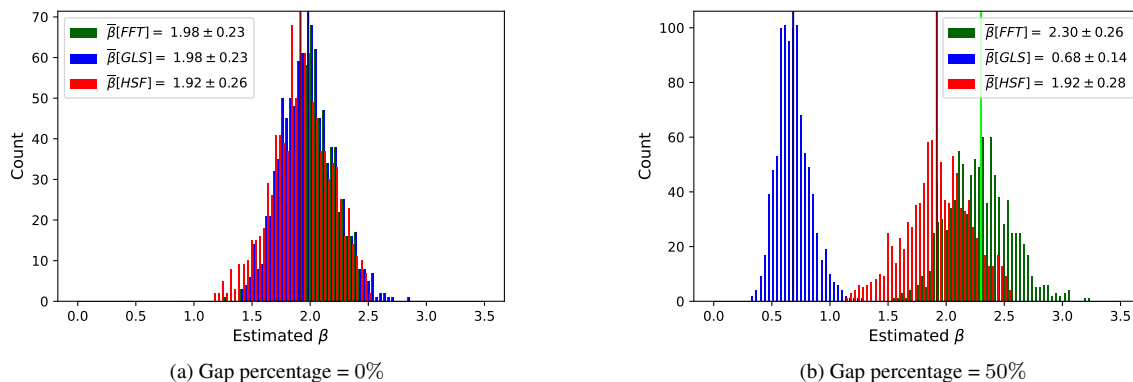

**Figure 5.** Histograms of the estimated  $\beta$  values from 1000 spectra of time series generated by the spectral ~~power-law-power-law~~ simulation (according to Sect.3.2) with a spectral exponent of  $\beta = 2$  within a 6-hour observation time. The vertical lines in the histograms of the gapped case refer to the mean estimated values of  $\beta$  by each method.

In the non-gapped case (see Fig.5a), the distributions of all methods overlap within a small standard-deviation range of  $\pm 0.2$  around  $\beta = 2$ . In contrast, we see that gaps cause the estimated  $\beta$  values from the FFT ~~and HSF spectra to spread over a larger~~  
~~range~~ spectra to shift their distribution to higher values around  $\beta = 2.3$  in Fig.5b, while the distribution of GLS ~~gets narrower~~  
 285 ~~and~~ diverts far below the expected value of 2. The mean of estimated  $\beta$  values from HSF spectra is clearly the closest to ~~both~~  
 the true value ~~-. These distributions and its mean in the absence of gaps, which shows consistency and less sensitivity to the~~  
~~gaps. It is worth noting that the distributions in Fig.5a~~ show that even in the absence of gaps, estimated  $\beta$  lies mostly within  
 the range of  $[1.5, 2.5]$  and not exactly at 2, as single spectra are distorted without averaging. It is also important to mention that  
 the results of the bias are quite identical whether  $\beta$  is estimated from averaging power-law exponents of single spectra or it is  
 290 estimated from fitting an averaged spectrum.

To further explore the behaviour of the bias under different conditions, we evaluated the effect of changing the simulated value of  $\beta$  on the estimation bias (see Fig.6). At 0% GP, all methods show no bias, except for  $\beta > 2$  and  $\beta = -1$ , where there is an apparent deviation. The first deviation is expected because the larger  $\beta$  is than 2, the more the spectrum suffers from "low-frequency leakage" due to the finite length of the time series (Klis, 1994; Schulz and Mudelsee, 2002). The other case of small

295 deviation takes place on the opposite end of the spectral slope range ( $\beta = -1$ ), where high frequencies dominate. The power at these frequencies is quite easily aliased, hence, underestimated, as they are the closest to the Nyquist limit. These deviations do not mean that spectra of  $\beta = -1$  or  $\beta > 2$  can not be obtained, but that on average, they are very likely to be misestimated. In the instance of gapped time series, our results show that as the GP increases, the biases in the estimated exponent also became more pronounced for all three methods. Similar to the non-gapped situation, the GLS demonstrates an exceptional efficiency

300 in estimating flat spectra where  $\beta = 0$  with a negligible bias. This is a consequence of the absence of frequency dependency in a flat spectrum, which renders the gaps irrelevant in terms of introducing bias, since the GLS spectrum is already flat. As  $\beta$  increases (indicating a steeper decline in power with increasing frequency) and the percentage of gaps in the data increases, the bias in the GLS spectrum becomes more prominent. For instance, in the case of  $\beta$  transitioning from  $1 \rightarrow 3$  where power is skewed towards low frequencies, gaps cause GLS to mistakenly assign excessive power at the missing high frequencies,

305 ultimately resulting in a steady underestimation of  $\beta$ . In contrast, when  $\beta = -1$ , high-frequency components dominate low-frequency ones. Consequently, there is a loss of power at these high frequencies as the gaps disrupt their sampling. This loss of power causes the GLS method to overestimate  $\beta$ , mirroring the GLS bias observed when  $\beta = 1$ .

In similar fashion, both the FFT and HSF demonstrate a relatively constant bias for  $\beta = 3$  of approximately  $-0.3$  at all GPs. However, as  $\beta$  decreases from  $2 \rightarrow -1$ , their biases monotonically increase as the GP increases. Nevertheless, the HSF shows

310 substantially less bias than the FFT when the GP exceeds 10%. The FFT bias is attributed to the established interpolation effects. Therefore, as more data points are interpolated, the FFT spectrum progressively underestimates the amplitude of the high frequencies. This underestimation results in the bias being positive for all  $\beta$  values, except  $\beta = 3$  where leakage causes FFT to overestimate these frequencies. Overall, averaging  $\beta$  values from single spectra is a good measure of the expected value because of their low standard-deviation except at very high GPs.

315 In light of the aforementioned considerations, it can be argued that the FFT technique demonstrates competence in generating accurate spectral estimations for non-gapped time series. Nevertheless, it encounters challenges as the data incorporates an increasing number of gaps, necessitating interpolation techniques which introduce inherent biases. Meanwhile, the HSF is demonstrated to be a particularly reliable approach for analysing GW time series with spectral ~~power-law~~power-law exponents  $\beta \in \{1, 5/3, 2, 2.5, 3\}$  and in-between. Its performance, however, exhibits limitations primarily in cases where the spectrum

320 of a time series possesses a ~~power-law~~power-law exponent  $\beta < 1$ . Notably, such occurrences have only been observed and predicted within measurements of vertical wind time series, as indicated in Tab.A1. One can reasonably anticipate that spectra falling within the range of  $\beta$  values between 1 and 3 will be prevalent across the majority of atmospheric time series.

Conversely, the GLS method yields similarly favourable outcomes, particularly for time series whose spectra are flat and high-frequency dominated, that it even surpasses the accuracy of HSF when  $\beta$  possesses values between  $-1$  and 0. Nonetheless, the

325 GLS method exhibits an increasing bias as the value of  $\beta$  increases beyond 0, rendering it a less certain choice for time scales extending beyond a few hours, which commonly occur in the context of atmospheric gravity waves. Clearly, the consistent and overall impeccable GLS performance on estimating periods and amplitudes of ~~single sinusoids~~signals with single frequencies does not seem to translate to universally resolve the level of superposition of many random periodicities with power-law

amplitudes.

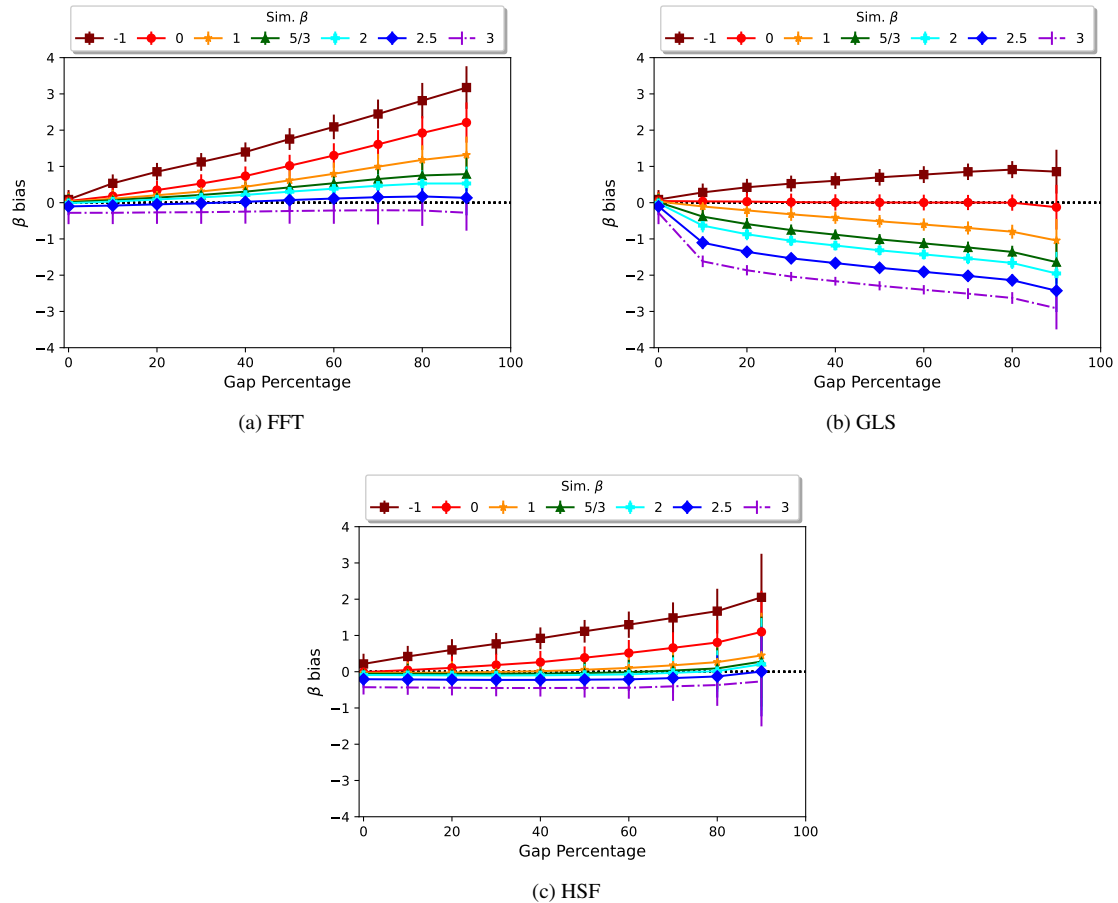

**Figure 6.** Comparison of the bias in the mean  $\beta$  estimates obtained from the three different methods as a function of gap percentage. The results of each method are shown for spectra with power-law exponents  $\beta \in \{-1, 0, 1, 5/3, 2, 2.5, 3\}$

330

## 6 Discussion

### 6.1 Low-Frequency Leakage

The problem of power leakage from low frequencies into higher ones arises as a result of the constrained frequency range, which of itself is limited by the observed time span  $T$ . This leakage does not only take place in the case of spectra with  $\beta > 2$ ,  
 335 but also in the spectra of time series with seales-periods longer than  $T$ . GWs can often have these kinds of seales-with-periods longer than the simulated time span, 6 h and normally these periods are not resolved. Thus, we also quantitatively tested the

effect of these long periods on the estimated spectra by adding 3 extra waves of periods 8, 10, and 12 h into the simulated time series. Two cases were examined, one where each of the 3 waves has an amplitude equivalent to the lowest frequency component in each simulation. In another case, we scaled their amplitudes by the same ~~power-law~~ power-law exponent  $\beta$  as all  
 340 frequencies in the simulation.

In both cases, longer-than- $T$  periods produced quite similar effects on the spectra, with a substantial positive bias observed for all signals with  $\beta < 2$  and a significant negative bias for  $\beta > 2$ , even in the absence of gaps. For instance, Figs. 7a,7b show an example of this leakage in averaged spectra for  $\beta = 3$ , without and with the extra waves. A common feature of both cases is the spectral power being excessively concentrated at the lowest frequencies. When the extra long waves are added, the leakage  
 345 becomes more drastic for the GLS and FFT, and their absolute biases of  $\beta$  increase. In contrast, the HSF is less affected by these long periods compared to the FFT and GLS. This effect of longer-than- $T$  waves in the time series resembles that of trends, which contribute to the spectral shape with a power-law exponent  $\beta = 2$  (Klis, 1994).

While a weighted fit of the spectra can reduce ~~this~~ the bias, it does not fully rectify the problem of leakage, it also requires a smoothed spectrum and may be confounded by other biases from observational noise, gaps, or method inefficiencies. ~~To~~ One  
 350 approach to counteract this leakage ~~;~~ we test the approach of from unresolved low-frequency power is based on "prewhitening" the ~~data followed by time series then~~ "postdarkening" the spectra ~~It~~ (Blackman and Tukey, 1958). Prewhitening is a technique to decorrelate the time series (reduce its autocorrelation close to that of a white noise signal) before calculating the PSD ~~;~~ which was coined by Blackman and Tukey (Blackman and Tukey, 1958) and mentioned throughout literature (Dewan and Grossbard, 2000; Guharay and Sekar, 2011). To apply prewhitening, we first difference the time series, i.e. subtract  
 355 (Keisler and Rhyne, 1976; Dewan and Grossbard, 2000; Guharay and Sekar, 2011). This step serves to decrease the rate of change of PSD( $f$ ) with frequency  $f$ , hence, the distribution of the power is more even. The prewhitened time series is obtained by the means of first-differencing; where each data point ~~from its previous value.~~ After obtaining the power spectrum, it is first smoothed using a Hann window to reduce the fluctuations, making it easier to fit the spectral shape. Then the spectrum is postdarkened through division by a factor of is subtracted from its successive one i.e.  $\Delta x(t) = x(t) - x(t - \Delta t)$ . By doing this,  
 360 the contribution of the mean becomes negligible and trends are transformed to constants (Bieber et al., 1993). The spectrum of this prewhitened series  $\Delta x(t)$  is related to the original spectrum of  $x(t)$  by:

$$\text{PSD}_{x(t)}(f) = \frac{\text{PSD}_{\Delta x(t)}(f)}{2(1 - \cos(2\pi f \Delta t))} \quad (10)$$

This factor  $2(1 - \cos(2\pi f_n \Delta t))$ ; ~~which compensates for prewhitening (i.e.,~~ is derived from the Fourier transform of the autocorrelation function of  $\Delta x(t)$  and is used to compensate for the prewhitening process (Houbolt et al., 1964). This compensation  
 365 postdarkens (recolours) the ~~time series~~ resulting spectrum. Note that the spectrum of the prewhitened series  $\Delta x(t)$  should be smoothed first using a Hann window to suppress the random fluctuations before postdarkening.

In Fig. 7c, we present the postdarkened spectra after prewhitening the time series for  $\beta = 3$ . This approach completely cancels out the bias in all methods for both cases. This confirms the effectiveness of the prewhitening and postdarkening method in correcting the leakage problem. However, this approach is not a perfect solution since it may introduce additional bias for less



370 steep spectra (where  $\beta < 1$ ) which do not suffer from leakage. When the spectrum is constant in the low-frequency part, the prewhitening process might cause it to be distorted as well.

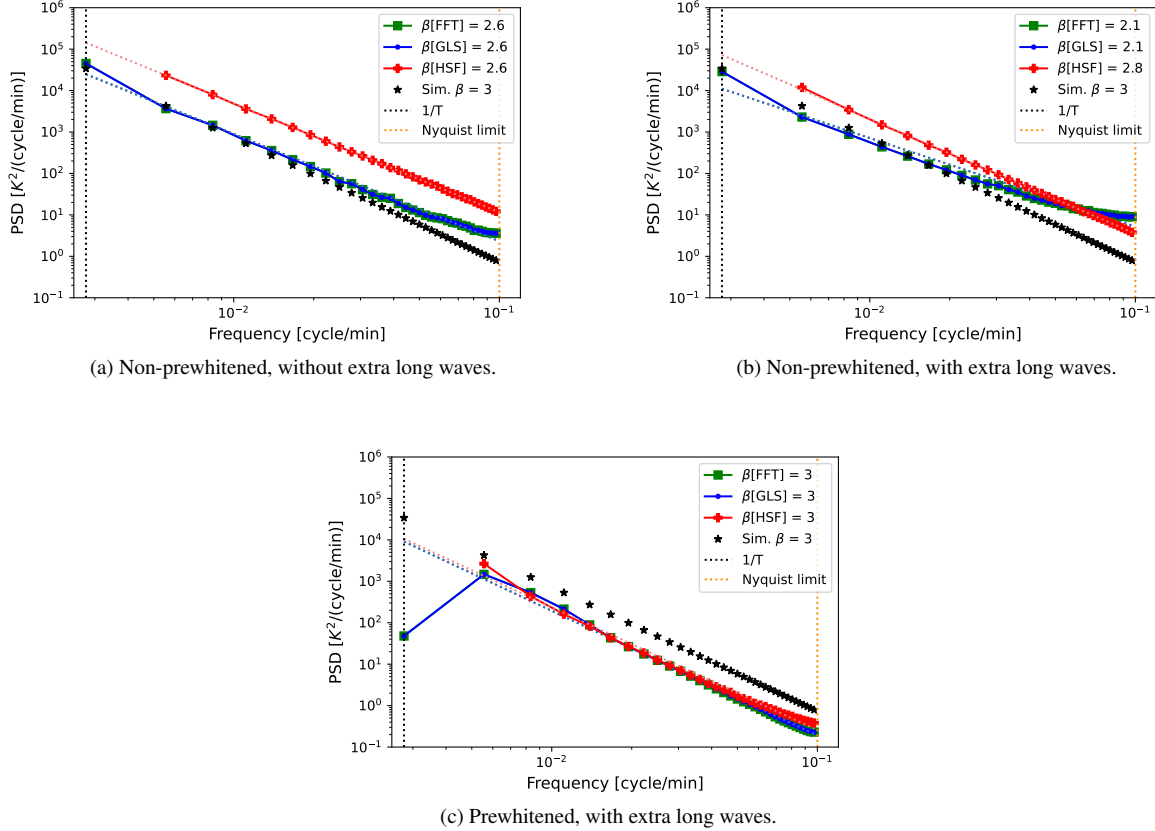

**Figure 7.** Averaged temporal spectra of non-gapped time series generated by the spectral power-law-power-law simulation with a spectral exponent of  $\beta = 3$  within a 6-hour observation time (a) without extra waves, (b) after the addition of 3 extra waves with frequencies lower than  $f = 1/T$  (particularly 8, 10, and 12 hours) to the simulation, (c) the postdarkened spectra of the prewhitened time series with extra waves. Here, also both axes were log-scaled so that a linear function can be identified. The dotted lines (in red, green and blue) represent the fits of the PSD of each method.

## 6.2 Method Selection Procedure

375 The spectral analysis of GW time series data is a complex task that requires careful consideration of various factors. Based on our simulation results, we propose a flowchart (see Fig. 8) that outlines a practical guide for selecting appropriate spectral estimation methods for GW studies, taking into account the characteristics of the observed data such as its complexity and percentage of gaps in it. From the flowchart, it is clear that there are recognisable differences between the patterns of the time series of superposed scales and single sinusoids waves and signals with one frequencies. Even within the former classification,

the anti-persistent time series whose spectra have  $\beta \in [0, -1]$  are still differentiable from those long-range dependent ones  
 380 where  $\beta \in [1, 3]$ . It is also safe to say that theoretical predictions of GW spectra with  $\beta \in [0, -1]$  exist only for measurements  
 of vertical wind time series (see Tab. A1). Otherwise,  $\beta \in [1, 3]$  spectra should be expected for the vast majority of atmospheric  
 time series. Note that, even in the absence of gaps in the signal, caution must be taken if the estimated  $\beta$  is approximately equal  
 to or less than 2. If it is, then it can be an accurate estimation, or caused by one of the systematic errors such as interpolation or  
 longer than  $T$  variations.

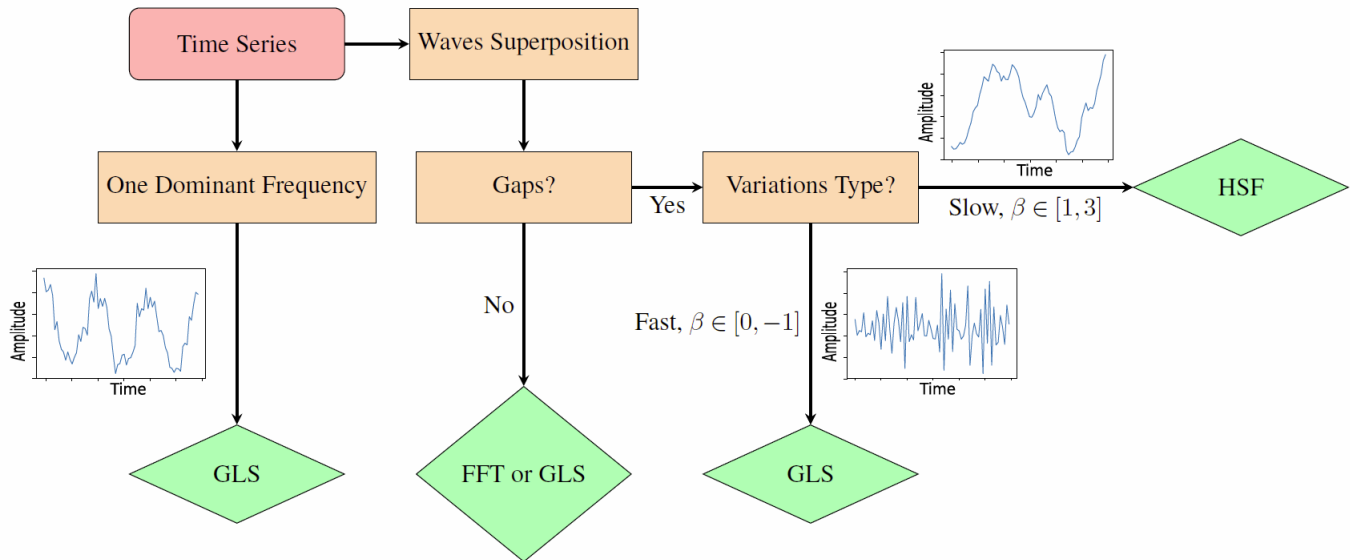

**Figure 8.** Recommended procedure for estimating power spectra of gravity waves time series.

385

## 7 Conclusions

Our study investigated the bias of the methods when estimating the spectra of GW time series using simulated data with various  
 characteristics. We first examined simulated signals consisting of single sinusoids in order to characterise real quasi-monochromatic  
 waves. The main findings are: The GLS and FFT are identical in The domain of observational analyses, especially in atmospheric  
 390 physics, is vast and complex. The intrinsic nature of these measurements requires precision, reliability, and adaptability of  
analytical methods to extract meaningful insights. Observational gaps due to instrument failures or adverse conditions are also  
common in atmospheric physics. Our research on synthetic atmospheric gravity wave (GW) time series offers a comprehensive  
overview of different spectral estimation methods, shedding light on their strengths and limitations. The methods compared in  
this study are the Fast Fourier Transform (FFT) (which requires interpolation of gaps), the Generalised Lomb-Scargle method

395 (GLS) and the case of evenly sampled data with no gaps. The GLS has relatively negligible bias in estimating the frequencies and amplitudes of gapped single sinusoids compared to the FFT. Up to 80% GP, the performance of the GLS shows no dependency on the frequency of the signal and proves efficiency in mitigating the effects of gaps in Haar Structure Function (HSF) (both which can handle unevenly sampled data without interpolation). Their performance is assessed by evaluating whether the output spectra of simulated time series (with known a priori features and gap distributions) match the input parameters of the data, while the absolute bias of the FFT drastically increases as both the GP and frequency increase. The inefficiency of the FFT in recovering the true frequency and amplitude of the signal is attributed to including the frequency, amplitude and spectral slope. Building on our findings, we propose the following recommendations:

400 **Determination of the Time Series Nature:** Initially, the series is assessed to determine if it represents a pattern of a signal with one frequency. If it does, the analysis proceeds directly to using the GLS method, especially if the required interpolation step, which distorts the time series. Overall, the GLS is a more reliable method for identifying the periodic components of gapped GW time contains gaps and/or demonstrates rapid variations. Rather than interpolating these gaps to use the FFT, which alters the data's characteristics, the GLS offers far more accurate spectral estimates.

405 **Evaluation of Data Gaps:** For more complex series, particularly when dealing with high-frequency sinusoids. Then we investigated the effects of gaps on the spectra of simulated time series composed of those characterised by a superposition of scales with waves or power-law amplitudes. Our results are summarised as follows: The choice of spectral estimation methods can significantly impact spectrum, the data is first assessed for observational gaps. The presence of such gaps profoundly affects the accuracy of  $\beta$  estimation, especially in the presence of data gaps and leakage effects. The FFT traditional spectral analysis methods like the FFT. If variations are rapid (i.e. the slope of that power-law spectrum  $\beta$  is in the range  $[-1, 0]$ ) the series is competent in generating accurate spectral estimations for non-gapped time series but faces challenges with increasing GP as it is interpolation-based, which is a source of biases. The HSF is reliable for analysing GW time series with spectral power-law exponents  $\beta \in [1, 3]$ , but exhibits limitations when again subjected to the GLS method. However, for slower variations such as the vast majority of atmospheric measurements, represented by a  $\beta$  is less than 1. The GLS method performs quite well for time series with flat and high-frequency dominated spectra, surpassing the accuracy of HSF for  $\beta \in [-1, 0]$ , but exhibits increasing bias for exponents beyond 0, making it less suitable for longer time scales. The reliance on an approach that is not interpolation-based, proves more advantageous in mitigating such biases. Even in the absence of gaps, all tested methods underestimate  $\beta$  for time series whose spectra are too steep ( $\beta > 2$ ), due to the leakage of power at low frequencies into high-frequency components. Waves that are value between  $[1, 3]$ , the HSF method is consistently the least biased.

420 **Mitigate Low-Frequency Leakage:** When the spectra of the time series with slow variations are analysed (even in the absence of gaps), it should be investigated whether low-frequency leakage takes place. Finite time series, very steep spectra and waves with periods longer than the observed time span can introduce similar leakage biases in  $\beta$  estimation, with positive biases for  $\beta < 2$  and negative biases for  $\beta > 2$ . The HSF was less affected by these slow variations compared to the FFT and GLS. Prewhitening the time series followed by postdarkening the spectra is recommended as a suitable approach to correct these low-frequency leakage problems. Our findings cause this kind of leakage. All tested methods, to varying extents, struggled with this leakage from unresolved low-frequency power, leading to biases in estimating the spectral slope  $\beta$ . Thus

430 we recommend cautiously applying the approach of prewhitening the time series and postdarkening the spectrum to address this problem. Prewhitening can be actualised by first-differencing the series which renders its spectrum close to that of white noise. Subsequently, postdarkening the spectrum is required to compensate for the prewhitening process via division by a frequency-dependent factor. Nevertheless, depending on the characteristics of the analysed time series, further steps (e.g. windowing) might be necessary to help counter other causes of leakage.

435 ~~These sequential decisions highlight the importance of carefully selecting appropriate spectral estimation methods and accounting for potential biases caused by data gaps, leakage effects, and long periods when interpreting  $\beta$  values from GW observations. Our findings contribute to the understanding of the limitations and uncertainties associated with  $\beta$  estimation and provide guidance for future research and advancements in spectral analysis techniques to improve the accuracy and reliability of  $\beta$  estimation in GW studies and to better understand the physical processes driving GW variability in tailoring analysis methods~~

440 to the characteristics of the data at hand. Employing a one-size-fits-all method can result in biased spectra, which are especially critical in GW parametrisations in all atmospheric models. Our recommendations, grounded in rigorous research on synthetic gravity wave time series, aim to guide researchers in making informed decisions, ensuring the accuracy of spectral results and advancing our understanding of the dynamics of the atmosphere.

*Code availability.* The code to simulate time series with power-law spectra, analyse and fit them is accessible under (Mossad, 2023).

445 *Author contributions.* M.M. wrote the codes to conduct these simulations, analyzed their results and drafted the manuscript. I.S., R.W., and G.B. provided supervision, scientific insight, and edited the text of the manuscript.

*Competing interests.* Robin Wing and Gerd Baumgarten are members of the editorial board of Atmospheric Measurement Techniques.

*Acknowledgements.* This paper is a contribution to the project W1 (Gravity Wave Parameterization for the Atmosphere) of the Collaborative Research Centre TRR 181 "Energy Transfers in Atmosphere and Ocean" funded by the Deutsche Forschungsgemeinschaft (DFG, German Research Foundation) - Projektnummer 274762653 and the Analyzing the Motion of the Middle Atmosphere Using Nighttime RMR-lidar Observations at the Midlatitude Station Kühlungsborn (AMUN) funded by Deutsche Forschungsgemeinschaft (DFG) - Projektnummer 445400792.

**Table A1.** Comparison of theoretical predictions and selected observed values of the power-law exponent  $\beta$  of GW spectra. Here  $T$  refers to temperature,  $W$  is wind and  $\rho$  is density.

| Reference                                                                                                    | Type of Spectra                                                                                     | Spectral exponent or $\beta$ |
|--------------------------------------------------------------------------------------------------------------|-----------------------------------------------------------------------------------------------------|------------------------------|
| <del>Universal spectrum (VanZandt, 1982)</del> <u>“Universal” spectrum (VanZandt, 1982, and ref. within)</u> | Vertical wavenumber spectra by Doppler navigator and anemometer of <i>horizontal W</i> observations | 2.4                          |
| Linear instability theory (Dewan and Good, 1986; Smith et al., 1987)                                         | Vertical wavenumber spectra of <i>horizontal W</i>                                                  | 3                            |
| Saturated-cascade theory (Dewan, 1994)                                                                       | Horizontal wavenumber spectra of <i>horizontal W</i> , $T$ and fractional $\rho$                    | 5/3                          |
| Saturated-cascade theory (Dewan, 1994)                                                                       | Vertical wavenumber spectra of <i>vertical W</i>                                                    | -1                           |
| Saturated-cascade theory (Dewan, 1994)                                                                       | Temporal spectra of <i>vertical W</i>                                                               | 0                            |
| Saturated-cascade theory (Dewan, 1994)                                                                       | Temporal spectra of <i>horizontal W</i> , $T$ and fractional $\rho$                                 | 2                            |
| Lidar observations (Shibata et al., 1988)                                                                    | Vertical wavenumber spectra of $T$ data                                                             | 2.5 to 3                     |
| Diffusive filtering theory (Gardner, 1994)                                                                   | Vertical wavenumber spectra of <i>horizontal W</i>                                                  | 3 (p=2)                      |
| Diffusive filtering theory (Gardner, 1994)                                                                   | Temporal spectra of <i>horizontal W</i>                                                             | 2 (p=2)                      |
| Diffusive filtering theory (Gardner, 1994)                                                                   | Vertical wavenumber spectra of <i>vertical W</i>                                                    | -1 (p=2)                     |
| Diffusive filtering theory (Gardner, 1994)                                                                   | Temporal spectra of <i>vertical W</i>                                                               | 0                            |
| Diffusive damping theory (Weinstock, 1990; Zhu, 1994)                                                        | Temporal spectra of <i>horizontal W</i>                                                             | p                            |
| Diffusive damping theory (Weinstock, 1990; Zhu, 1994)                                                        | Vertical wavenumber spectra of <i>horizontal W</i>                                                  | 3                            |
| Doppler spread theory (Hines, 1991)                                                                          | Vertical wavenumber spectra of <i>horizontal W</i>                                                  | 3                            |
| Doppler spread theory (Hines, 1991)                                                                          | Temporal spectra of <i>horizontal W</i>                                                             | p                            |
| Lidar observations (Gardner et al., 1995)                                                                    | Temporal spectra of $\rho$ data                                                                     | 2.3                          |
| Lidar observations (Gardner et al., 1995)                                                                    | Temporal spectra of $T$ data                                                                        | 1.6                          |
| Lidar observations (Gardner et al., 1995)                                                                    | Temporal spectra of <i>vertical W</i> data                                                          | $\approx 0$                  |
| Lidar observations (Gardner et al., 1995)                                                                    | Vertical wavenumber spectra of $\rho$ data                                                          | 3.5                          |
| Lidar observations (Gardner et al., 1995)                                                                    | Vertical wavenumber spectra of $T$ data                                                             | 2.5                          |
| Lidar observations (Gardner et al., 1995)                                                                    | Vertical wavenumber spectra of <i>vertical W</i> data                                               | 1.4 to 1.9                   |
| Radiosonde observations (Zhang et al., 2017)                                                                 | Vertical wavenumber spectra of <i>zonal W</i> data                                                  | 2.4 to 2.68                  |
| Radiosonde observations (Zhang et al., 2017)                                                                 | Vertical wavenumber spectra of <i>meridional W</i> data                                             | 2.53 to 2.76                 |
| Radiosonde observations (Zhang et al., 2017)                                                                 | Vertical wavenumber spectra of <i>vertical W</i> data                                               | 0.2 to 0.3                   |
| Balloon observations (He et al., 2020)                                                                       | Vertical wavenumber spectra of $T$ data                                                             | 2.18 to 2.63                 |
| <u>Balloon observations (Hertzog and Vial, 2001)</u>                                                         | <u>Lagrangian wavenumber–frequency spectra of <i>horizontal W</i> (meridional and zonal) data</u>   | <u>1.9 to 2.2</u>            |
| <u>Balloon observations (Hertzog and Vial, 2001)</u>                                                         | <u>Lagrangian wavenumber–frequency spectra of <i>vertical W</i> data</u>                            | <u>0.2 to 0.5</u>            |
| <u>Balloon observations (Podglajen et al., 2016)</u>                                                         | <u>Lagrangian temporal spectra of <i>horizontal W</i> data in period range [4 h, 20 min]</u>        | <u>1.78 to 1.96</u>          |

## References

- Alexander, M., Tsuda, T., and Vincent, R. N.: Latitudinal Variations Observed in Gravity Waves with Short Vertical Wavelengths, *Journal of the Atmospheric Sciences*, 59, 1394–1404, [https://doi.org/10.1175/1520-0469\(2002\)059<1394:LVOIGW>2.0.CO;2](https://doi.org/10.1175/1520-0469(2002)059<1394:LVOIGW>2.0.CO;2), 2002.
- Axford, D.: Spectral analysis of an aircraft observation of gravity waves, *Quarterly Journal of the Royal Meteorological Society*, 97, 313–321, <https://doi.org/10.1002/qj.49709741306>, 1971.
- Babu, A. N., Kumar, K. S., Kumar, G. R., Ratnam, M. V., Rao, S. V., and Rao, D. C.: Long-term MST radar observations of vertical wave number spectra of gravity waves in the tropical troposphere over Gadanki (13.5° N, 79.2° E): comparison with model spectra, *Annales Geophysicae*, 26, 1671–1680, <https://doi.org/10.5194/angeo-26-1671-2008>, 2008.
- Babu, P. and Stoica, P.: Spectral analysis of nonuniformly sampled data – a review, *Digital Signal Processing*, 20, 359–378, <https://doi.org/10.1016/j.dsp.2009.06.019>, 2010.
- Beldon, C. L. and Mitchell, N. J.: Gravity wave–tidal interactions in the mesosphere and lower thermosphere over Rothera, Antarctica (68°S, 68°W), *Journal of Geophysical Research*, 115, <https://doi.org/10.1029/2009jd013617>, 2010.
- Beres, J., Garcia, R. R., Boville, B. A., and Sassi, F.: Implementation of a gravity wave source spectrum parameterization dependent on the properties of convection in the Whole Atmosphere Community Climate Model (WACCM), *Journal of Geophysical Research*, 110, <https://doi.org/10.1029/2004jd005504>, 2005.
- Bieber, J. W., Chen, J., Matthaeus, W. H., Smith, C. W., and Pomerantz, M. A.: Long-term variations of interplanetary magnetic field spectra with implications for cosmic ray modulation, *Journal of Geophysical Research*, 98, 3585–3603, <https://doi.org/10.1029/92ja02566>, 1993.
- Billah, K. Y. R. and Shinozuka, M.: Numerical method for colored-noise generation and its application to a bistable system, *Phys. Rev. A*, 42, 7492–7495, <https://doi.org/10.1103/PhysRevA.42.7492>, 1990.
- Blackman, R. B. and Tukey, J. W.: The measurement of power spectra from the point of view of communications engineering — Part I, *Bell System Technical Journal*, 37, 185–282, <https://doi.org/10.1002/j.1538-7305.1958.tb03874.x>, 1958.
- Brown, T. M. and Christensen-Dalsgaard, J.: A technique for estimating complicated power spectra from time series with gaps, *The Astrophysical Journal*, 349, 667, <https://doi.org/10.1086/168354>, 1990.
- Clauset, A., Shalizi, C. R., and Newman, M.: Power-law distributions in empirical data, *Siam Review*, 51, 661–703, <https://doi.org/10.1137/070710111>, 2009.
- Cooley, J. and Tukey, J. W.: An algorithm for the machine calculation of complex Fourier series, *Mathematics of Computation*, 19, 297–301, <https://doi.org/10.1090/s0025-5718-1965-0178586-1>, 1965.
- Crowley, G. and Williams, P.: Observations of the source and propagation of atmospheric gravity waves, *Nature*, 328, 231–233, <https://doi.org/10.1038/328231a0>, 1987.
- Dewan, E.: The saturated-cascade model for atmospheric gravity wave spectra, and the wavelength-period (W-P) relations, *Geophysical Research Letters*, 21, 817–820, <https://doi.org/10.1029/94gl00702>, 1994.
- Dewan, E. M. and Good, R. E.: Saturation and the “universal” spectrum for vertical profiles of horizontal scalar winds in the atmosphere, *Journal of Geophysical Research*, 91, 2742, <https://doi.org/10.1029/jd091id02p02742>, 1986.
- Dewan, E. M. and Grossbard, N.: Power spectral artifacts in published balloon data and implications regarding saturated gravity wave theories, *Journal of Geophysical Research*, 105, 4667–4683, <https://doi.org/10.1029/1999jd901108>, 2000.
- Duvall, T. L. and Harvey, J. T.: Solar Doppler shifts: sources of continuous spectra, Springer, [https://doi.org/10.1007/978-94-009-4608-8\\_11](https://doi.org/10.1007/978-94-009-4608-8_11), 1986.

- 490 Eckermann, S. D. and Hocking, W. K.: Effect of superposition on measurements of atmospheric gravity waves: A cautionary note and some reinterpretations, *Journal of Geophysical Research*, 94, 6333, <https://doi.org/10.1029/jd094id05p06333>, 1989.
- Ern, M., Trinh, Q. T., Preusse, P., Gille, J. C., Mlynczak, M. G., Russell, J. M., and Riese, M.: GRACILE: a comprehensive climatology of atmospheric gravity wave parameters based on satellite limb soundings, *Earth System Science Data*, 10, 857–892, <https://doi.org/10.5194/essd-10-857-2018>, 2018.
- 495 Eyer, L. and Bartholdi, P.: Variable stars: Which Nyquist frequency?, *Astronomy & astrophysics. Supplement series*, 135, 1–3, <https://doi.org/10.1051/aas:1999102>, 1999.
- Ferraz-Mello, S.: Estimation of Periods from Unequally Spaced Observations, *The Astronomical Journal*, 86, 619, <https://doi.org/10.1086/112924>, 1981.
- Fritts, D. C.: A review of gravity wave saturation processes, effects, and variability in the middle atmosphere, *Pure and Applied Geophysics*, 130, 343–371, <https://doi.org/10.1007/bf00874464>, 1989.
- 500 Fritts, D. C. and Alexander, M.: Gravity wave dynamics and effects in the middle atmosphere, *Reviews of Geophysics*, 41, <https://doi.org/10.1029/2001rg000106>, 2003.
- Fritts, D. C. and VanZandt, T. E.: Spectral Estimates of gravity wave energy and momentum fluxes. Part I: Energy dissipation, acceleration, and constraints, *Journal of the Atmospheric Sciences*, 50, 3685–3694, [https://doi.org/10.1175/1520-0469\(1993\)050<3685:SEOGWE>2.0.CO;2](https://doi.org/10.1175/1520-0469(1993)050<3685:SEOGWE>2.0.CO;2), 1993.
- 505 Fritts, D. C., Tsuda, T., Sato, T., Fukao, S., and Kato, S.: Observational evidence of a saturated gravity wave spectrum in the troposphere and lower stratosphere, *Journal of the Atmospheric Sciences*, 45, 1741–1759, [https://doi.org/10.1175/1520-0469\(1988\)045<1741:OEOASG>2.0.CO;2](https://doi.org/10.1175/1520-0469(1988)045<1741:OEOASG>2.0.CO;2), 1988.
- Gardner, C. S.: Diffusive filtering theory of gravity wave spectra in the atmosphere, *Journal of Geophysical Research*, 99, 20601, <https://doi.org/10.1029/94jd00819>, 1994.
- 510 Gardner, C. S., Tao, X., and Papen, G. C.: Simultaneous lidar observations of vertical wind, temperature, and density profiles in the upper mesosphere: Evidence for nonseparability of atmospheric perturbation spectra, *Geophysical Research Letters*, 22, 2877–2880, <https://doi.org/10.1029/95gl02783>, 1995.
- Gerding, M., Höffner, J., Lautenbach, J., Rauthe, M., and Lübken, F.-J.: Seasonal variation of nocturnal temperatures between 1 and 105 km altitude at 54° N observed by lidar, *Atmospheric Chemistry and Physics*, 8, 7465–7482, <https://doi.org/10.5194/acp-8-7465-2008>, 2008.
- 515 Guharay, A. and Sekar, R.: Seasonal characteristics of gravity waves in the middle atmosphere over Gadanki using Rayleigh lidar observations, *Journal of Atmospheric and Solar-Terrestrial Physics*, 73, 1762–1770, <https://doi.org/10.1016/j.jastp.2011.04.013>, 2011.
- Haar, A.: On the theory of orthogonal function systems, *Math. Annals*, 69, 331–371, 1910.
- Hall, C. M. and Aso, T.: Mesospheric velocities and buoyancy subrange spectral slopes determined over Svalbard by ESR, *Geophysical Research Letters*, <https://doi.org/10.1029/1999gl000340>, 1999.
- 520 Hamilton, K.: The role of parameterized drag in a troposphere-stratosphere-mesosphere general circulation model, Springer, [https://doi.org/10.1007/978-3-642-60654-0\\_23](https://doi.org/10.1007/978-3-642-60654-0_23), 1997.
- He, Y., Sheng, Z., and He, M.: Spectral Analysis of Gravity Waves from Near Space High-Resolution Balloon Data in Northwest China, *Atmosphere*, 11, 133, <https://doi.org/10.3390/atmos11020133>, 2020.
- 525 Hébert, R., Rehfeld, K., and Laepple, T.: Comparing estimation techniques for temporal scaling in palaeoclimate time series, *Nonlinear Processes in Geophysics*, 28, 311–328, <https://doi.org/10.5194/npg-28-311-2021>, 2021.



- Hertzog, A. and Vial, F.: A study of the dynamics of the equatorial lower stratosphere by use of ultra-long-duration balloons: 2. Gravity waves, *Journal of Geophysical Research*, 106, 22 745–22 761, <https://doi.org/10.1029/2000jd000242>, 2001.
- Hines, C. O.: Internal atmospheric gravity waves at ionospheric heights, *Canadian Journal of Physics*, 38, 1441–1481, <https://doi.org/10.1139/p60-150>, 1960.
- 530 Hines, C. O.: The Saturation of Gravity Waves in the Middle Atmosphere. Part II: Development Of Doppler-Spread Theory, *Journal of the Atmospheric Sciences*, 48, 1361–1379, [https://doi.org/10.1175/1520-0469\(1991\)048<1361:TSGOWI>2.0.CO;2](https://doi.org/10.1175/1520-0469(1991)048<1361:TSGOWI>2.0.CO;2), 1991.
- Holton, J. M.: The influence of gravity wave breaking on the general circulation of the middle atmosphere, *Journal of the Atmospheric Sciences*, 40, 2497–2507, [https://doi.org/10.1175/1520-0469\(1983\)040<2497:TIOGWB>2.0.CO;2](https://doi.org/10.1175/1520-0469(1983)040<2497:TIOGWB>2.0.CO;2), 1983.
- 535 Horne, J. H. and Baliunas, S. L.: A prescription for period analysis of unevenly sampled time series, *The Astrophysical Journal*, 302, 757, <https://doi.org/10.1086/164037>, 1986.
- Houbolt, J. C., Steiner, R., and Pratt, K. G.: Dynamic response of airplanes to atmospheric turbulence including flight data on input and response, vol. 199, National Aeronautics and Space Administration, 1964.
- Houchi, K., Stoffelen, A., Marseille, G.-J., and De Kloe, J.: Comparison of wind and wind shear climatologies derived from high-resolution radiosondes and the ECMWF model, *Journal of Geophysical Research*, 115, <https://doi.org/10.1029/2009jd013196>, 2010.
- 540 Hébert, R.: RScaling.v1.0.0, <https://doi.org/10.5281/zenodo.5037581>, 2021.
- Keisler, S. R. and Rhyne, R. H.: An assessment of prewhitening in estimating power spectra of atmospheric turbulence at long wavelengths, Tech. rep., NASA Langley Research Center, <https://ntrs.nasa.gov/api/citations/19770005667/downloads/19770005667.pdf>, 1976.
- Kirchner, J. W.: Aliasing in  $1/f^\alpha$  noise spectra: Origins, consequences, and remedies, *Phys. Rev. E*, 71, 066 110, <https://doi.org/10.1103/PhysRevE.71.066110>, 2005.
- 545 Klis, M.: Rapid variability in x-ray binaries—towards a unified description, NATO Science Series C, Springer, Dordrecht, Netherlands, 1995 edn., <https://hdl.handle.net/11245/1.421015>, 1994.
- Lepot, M., Aubin, J.-B., and Clemens, F.: Interpolation in Time Series: An introductory overview of existing methods, their performance criteria and uncertainty assessment, *Water*, 9, 796, <https://doi.org/10.3390/w9100796>, 2017.
- 550 Lindgren, E., Sheshadri, A., Podglajen, A., and Carver, R. W.: Seasonal and latitudinal variability of the gravity wave spectrum in the lower stratosphere, *Journal Of Geophysical Research: Atmospheres*, 125, <https://doi.org/10.1029/2020jd032850>, 2020.
- Lindzen, R. S.: Turbulence and stress owing to gravity wave and tidal breakdown, *Journal of Geophysical Research*, 86, 9707, <https://doi.org/10.1029/jc086ic10p09707>, 1981.
- Liu, H., McInerney, J., Santos, S. A., Lauritzen, P. H., Taylor, M. J., and Pedatella, N.: Gravity waves simulated by high-resolution Whole Atmosphere Community Climate Model, *Geophysical Research Letters*, 41, 9106–9112, <https://doi.org/10.1002/2014gl062468>, 2014.
- 555 Lomb, N. R.: Least-squares frequency analysis of unequally spaced data, *Astrophysics and Space Science*, 39, 447–462, <https://doi.org/10.1007/bf00648343>, 1976.
- Lovejoy, S.: A voyage through scales, a missing quadrillion and why the climate is not what you expect, *Climate Dynamics*, 44, 3187–3210, <https://doi.org/10.1007/s00382-014-2324-0>, 2014.
- 560 Lovejoy, S. and Schertzer, D.: Haar wavelets, fluctuations and structure functions: convenient choices for geophysics, *Nonlinear Processes in Geophysics*, 19, 513–527, <https://doi.org/10.5194/npg-19-513-2012>, 2012.
- Maekawa, Y., Fukao, S., Sato, T., Kato, S., and Woodman, R. F.: Internal inertia–gravity waves in the tropical lower stratosphere observed by the Arecibo Radar, *Journal of the Atmospheric Sciences*, 41, 2359–2367, [https://doi.org/10.1175/1520-0469\(1984\)041<2359:IIWITT>2.0.CO;2](https://doi.org/10.1175/1520-0469(1984)041<2359:IIWITT>2.0.CO;2), 1984.

- 565 Marinna, A. M., Alfredo, L. A., and Christopher, R. S.: Using the Lomb-Scargle method for wave statistics from gappy time series, *IEEE Conference Proceedings*, 2019, 1–9, [https://jglobal.jst.go.jp/en/detail?JGLOBAL\\_ID=202002230207587866](https://jglobal.jst.go.jp/en/detail?JGLOBAL_ID=202002230207587866), 2019.
- Meisel, D. D.: Fourier transforms of data sampled at unequal observational intervals, *The Astronomical Journal*, 83, 538, <https://doi.org/10.1086/112233>, 1978.
- Mossad, M.: *GapWaveSpectra*, <https://doi.org/10.5281/zenodo.8136556>, 2023.
- 570 Munteanu, C., Negrea, C., Echim, M., and Mursula, K.: Effect of data gaps: comparison of different spectral analysis methods, *Annales Geophysicae*, 34, 437–449, <https://doi.org/10.5194/angeo-34-437-2016>, 2016.
- Muraoka, Y., Sugiyama, T., Kawahira, K., Sato, T., Tsuda, T., Fukao, S., and Kato, S.: Cause of a monochromatic inertia-gravity wave breaking observed by the MU radar, *Geophysical Research Letters*, <https://doi.org/10.1029/gl015i012p01349>, 1988.
- Nastrom, G. D., Van Zandt, T. E., and Warnock, J. M.: Vertical wavenumber spectra of wind and temperature from high-resolution balloon soundings over Illinois, *Journal of Geophysical Research*, 102, 6685–6701, <https://doi.org/10.1029/96jd03784>, 1997.
- 575 Pichon, A. L., Assink, J., Heinrich, P., Blanc, E., Charlton-Perez, A., Lee, C. S., Keckhut, P., Hauchecorne, A., Rüfenacht, R., Kämpfer, N., Drob, D. P., Smets, P., Evers, L., Ceranna, L., Pilger, C., Ross, O. A., and Claud, C.: Comparison of co-located independent ground-based middle atmospheric wind and temperature measurements with numerical weather prediction models, *Journal Of Geophysical Research: Atmospheres*, 120, 8318–8331, <https://doi.org/10.1002/2015jd023273>, 2015.
- 580 Pinel, J. and Lovejoy, S.: Atmospheric waves as scaling, turbulent phenomena, *Atmospheric Chemistry and Physics*, 14, 3195–3210, 2014.
- Podglajen, A., Hertzog, A., Plougonven, R., and Legras, B.: Lagrangian temperature and vertical velocity fluctuations due to gravity waves in the lower stratosphere, *Geophysical Research Letters*, 43, 3543–3553, <https://doi.org/10.1002/2016gl068148>, 2016.
- Qing, H., Zhou, C., Zhao, Z., Chen, G., Ni, B., Gu, X., Yang, G., and Zhang, Y.: A statistical study of inertia gravity waves in the troposphere based on the measurements of Wuhan Atmosphere Radio Exploration (WARE) radar, *Journal Of Geophysical Research: Atmospheres*, 119, 3701–3714, <https://doi.org/10.1002/2013jd020684>, 2014.
- 585 Rao, N. K., Ratnam, M. V., Vedavathi, C., Tsuda, T., Murthy, B. V. K., Sathishkumar, S., Gurubaran, S., Kumar, K. S., Subrahmanyam, K. V., and Rao, S. V.: Seasonal, inter-annual and solar cycle variability of the quasi two day wave in the low-latitude mesosphere and lower thermosphere, *Journal of Atmospheric and Solar-Terrestrial Physics*, 152–153, 20–29, <https://doi.org/10.1016/j.jastp.2016.11.005>, 2017.
- Rice, S. O.: Mathematical analysis of random noise, *Bell System Technical Journal*, 23, 282–332, <https://doi.org/10.1002/j.1538-7305.1944.tb00874.x>, 1944.
- 590 Rigling, B. D.: Application of temporal gap filling to natural power law spectrums, *IEEE Geoscience and Remote Sensing Letters*, 9, 624–628, <https://doi.org/10.1109/lgrs.2011.2177062>, 2012.
- Roberts, D. A., Lehar, J., and Dreher, J.: Time Series Analysis with Clean - Part One - Derivation of a Spectrum, *The Astronomical Journal*, 93, 968, <https://doi.org/10.1086/114383>, 1987.
- 595 Scargle, J. D.: Studies in astronomical time series analysis. II - Statistical aspects of spectral analysis of unevenly spaced data, *The Astrophysical Journal*, 263, 835, <https://doi.org/10.1086/160554>, 1982.
- Schulz, M. and Mudelsee, M.: REDFIT: estimating red-noise spectra directly from unevenly spaced paleoclimatic time series, *Computers & Geosciences*, 28, 421–426, [https://doi.org/10.1016/s0098-3004\(01\)00044-9](https://doi.org/10.1016/s0098-3004(01)00044-9), 2002.
- Schulz, M. and Stettegger, K.: Spectrum: spectral analysis of unevenly spaced paleoclimatic time series, *Computers & Geosciences*, 23, 929–945, [https://doi.org/10.1016/s0098-3004\(97\)00087-3](https://doi.org/10.1016/s0098-3004(97)00087-3), 1997.
- 600 Schuster, A.: On the investigation of hidden periodicities with application to a supposed 26 day period of meteorological phenomena, *Journal of Geophysical Research*, 3, 13, <https://doi.org/10.1029/tm003i001p00013>, 1898.

- Shibata, T., Ichimori, S., Narikiyo, T., and Maeda, M.: Spectral analysis of vertical temperature profiles observed by a lidar in the upper stratosphere and the lower mesosphere, *Journal of the Meteorological Society of Japan. Ser. II*, 66, 1001–1005, [https://doi.org/10.2151/jmsj1965.66.6\\_1001](https://doi.org/10.2151/jmsj1965.66.6_1001), 1988.
- Shinozuka, M.: Simulation of Multivariate and Multidimensional Random Processes, *The Journal of the Acoustical Society of America*, 49, 357–368, <https://doi.org/10.1121/1.1912338>, 2005.
- Sica, R. J. and Russell, A. G.: How many waves are in the gravity wave spectrum?, *Geophysical Research Letters*, 26, 3617–3620, <https://doi.org/10.1029/1999gl003683>, 1999.
- Smith, A. M.: Global Dynamics of the MLT, *Surveys in Geophysics*, 33, 1177–1230, <https://doi.org/10.1007/s10712-012-9196-9>, 2012.
- Smith, S. M., Fritts, D. C., and VanZandt, T. E.: Evidence for a saturated spectrum of atmospheric gravity waves, *Journal of the Atmospheric Sciences*, 44, 1404–1410, [https://doi.org/10.1175/1520-0469\(1987\)044<1404:EFASSO>2.0.CO;2](https://doi.org/10.1175/1520-0469(1987)044<1404:EFASSO>2.0.CO;2), 1987.
- Song, I.-S. and Chun, H.-Y.: A Lagrangian Spectral Parameterization of Gravity Wave Drag Induced by Cumulus Convection, *Journal of the Atmospheric Sciences*, 65, 1204–1224, <https://doi.org/10.1175/2007jas2369.1>, 2008.
- Springford, A., Eadie, G. M., and Thomson, D. J.: Improving the Lomb–Scargle Periodogram with the Thomson Multitaper, *The Astronomical Journal*, 159, 205, <https://doi.org/10.3847/1538-3881/ab7fa1>, 2020.
- Swenson, G. R., Haque, R., Yang, W., and Gardner, C. S.: Momentum and energy fluxes of monochromatic gravity waves observed by an OH imager at Starfire Optical Range, New Mexico, *Journal of Geophysical Research*, 104, 6067–6080, <https://doi.org/10.1029/1998jd200080>, 1999.
- Vanderplas, J.: Understanding the lomb–scargle periodogram, *Astrophysical Journal Supplement Series*, 236, 16, <https://doi.org/10.3847/1538-4365/aab766>, 2018.
- VanZandt, T.: A universal spectrum of buoyancy waves in the atmosphere, *Geophysical Research Letters*, 9, 575–578, <https://doi.org/10.1029/g1009i005p00575>, 1982.
- Vio, R., Andreani, P., and Biggs, A. D.: Unevenly-sampled signals: a general formalism for the Lomb-Scargle periodogram, *Astronomy and Astrophysics*, <https://doi.org/10.1051/0004-6361/201014079>, 2010.
- Weinstock, J.: Nonlinear Theory of Gravity Waves: Momentum Deposition, Generalized Rayleigh Friction, and Diffusion, *Journal of Atmospheric Sciences*, 39, 1698 – 1710, [https://doi.org/https://doi.org/10.1175/1520-0469\(1982\)039<1698:NTOGWM>2.0.CO;2](https://doi.org/https://doi.org/10.1175/1520-0469(1982)039<1698:NTOGWM>2.0.CO;2), 1982.
- Weinstock, J.: Saturated and unsaturated spectra of gravity waves and scale-dependent diffusion, *Journal of the Atmospheric Sciences*, 47, 2211–2226, [https://doi.org/10.1175/1520-0469\(1990\)047<2211:SAUSOG>2.0.CO;2](https://doi.org/10.1175/1520-0469(1990)047<2211:SAUSOG>2.0.CO;2), 1990.
- Zechmeister, M. and Kürster, M.: The generalised Lomb-Scargle periodogram. A new formalism for the floating-mean and Keplerian periodograms, *Astronomy and Astrophysics*, 496, 577–584, <https://doi.org/10.1051/0004-6361:200811296>, 2009.
- Zhan, Q., Manson, A. H., and Meek, C.: The impact of gaps and spectral methods on the spectral slope of the middle atmospheric wind, *Journal of atmospheric and terrestrial physics*, [https://doi.org/10.1016/0021-9169\(95\)00159-x](https://doi.org/10.1016/0021-9169(95)00159-x), 1996.
- Zhang, S., Huang, C., and Yi, F.: Radiosonde observations of vertical wave number spectra for gravity waves in the lower atmosphere over Central China, *Annales Geophysicae*, 24, 3257–3265, <https://doi.org/10.5194/angeo-24-3257-2006>, 2006.
- Zhang, S., Huang, C., Huang, K., Gong, Y., Chen, G., Gan, Q., and Zhang, Y.: Latitudinal and seasonal variations of vertical wave number spectra of three-dimensional winds revealed by radiosonde observations, *Journal Of Geophysical Research: Atmospheres*, 122, 13,174–13,190, <https://doi.org/10.1002/2017jd027602>, 2017.

- Zhang, S.-N., Peterson, R. N., Wiens, R. H., and Shepherd, G. G.: Gravity waves from O<sub>2</sub> nightglow during the AIDA '89 campaign  
640 I: emission rate/temperature observations, *Journal of atmospheric and terrestrial physics*, 55, 355–375, [https://doi.org/10.1016/0021-9169\(93\)90074-9](https://doi.org/10.1016/0021-9169(93)90074-9), 1993.
- Zhu, X.: A new theory of the saturated gravity wave spectrum for the middle atmosphere, *Journal of the Atmospheric Sciences*, pp. 3615 – 3626, [https://doi.org/10.1175/1520-0469\(1994\)051<3615:ANTOTS>2.0.CO;2](https://doi.org/10.1175/1520-0469(1994)051<3615:ANTOTS>2.0.CO;2), 1994.
